# Supplementary material for: Synthesis and in Vitro Antiproliferative Evaluation of Some B-norcholesteryl Benzimidazole and Benzothiazole Derivatives
Source: Mar Drugs. 2015 Apr 22;13(4):2488–504. doi: 10.3390/md13042488 (PMC4413222; doi:10.3390/md13042488)
Supplement: Supplementary File 1 [file marinedrugs-13-02488-s001.pdf]

## Supplementary Information

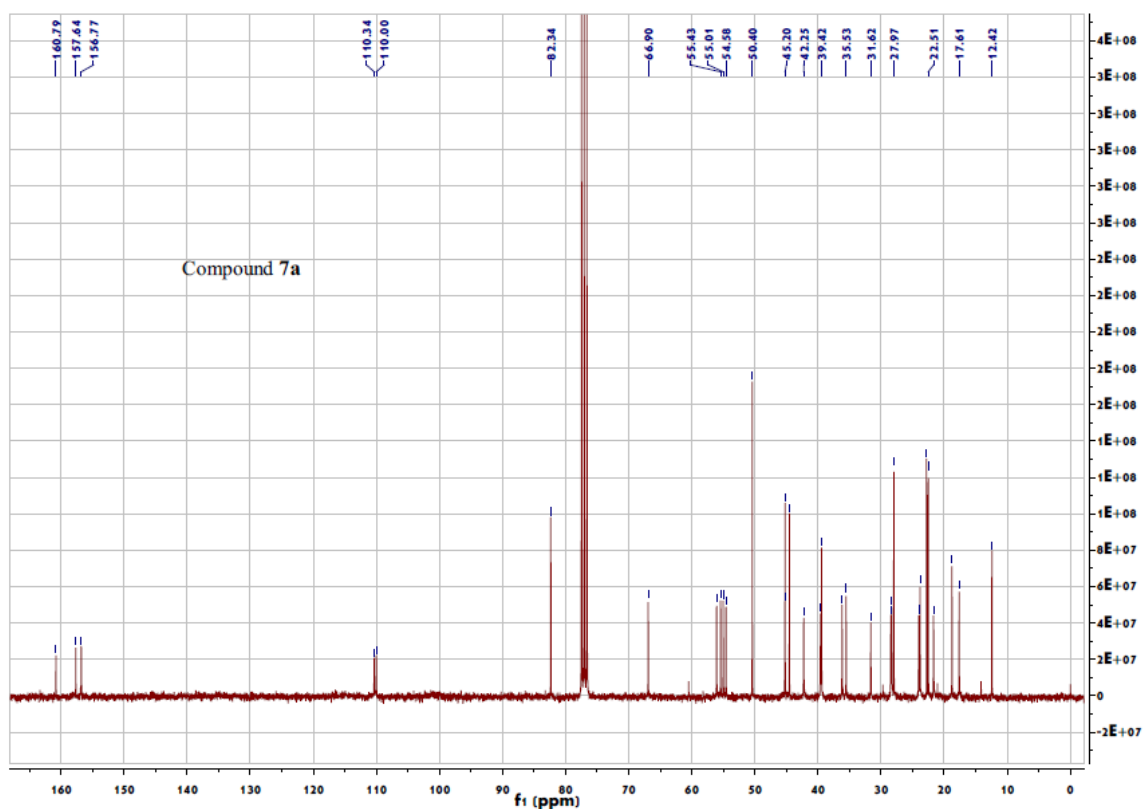

Figure S1. Compound 7a  $^{13}\text{C}$  NMR.

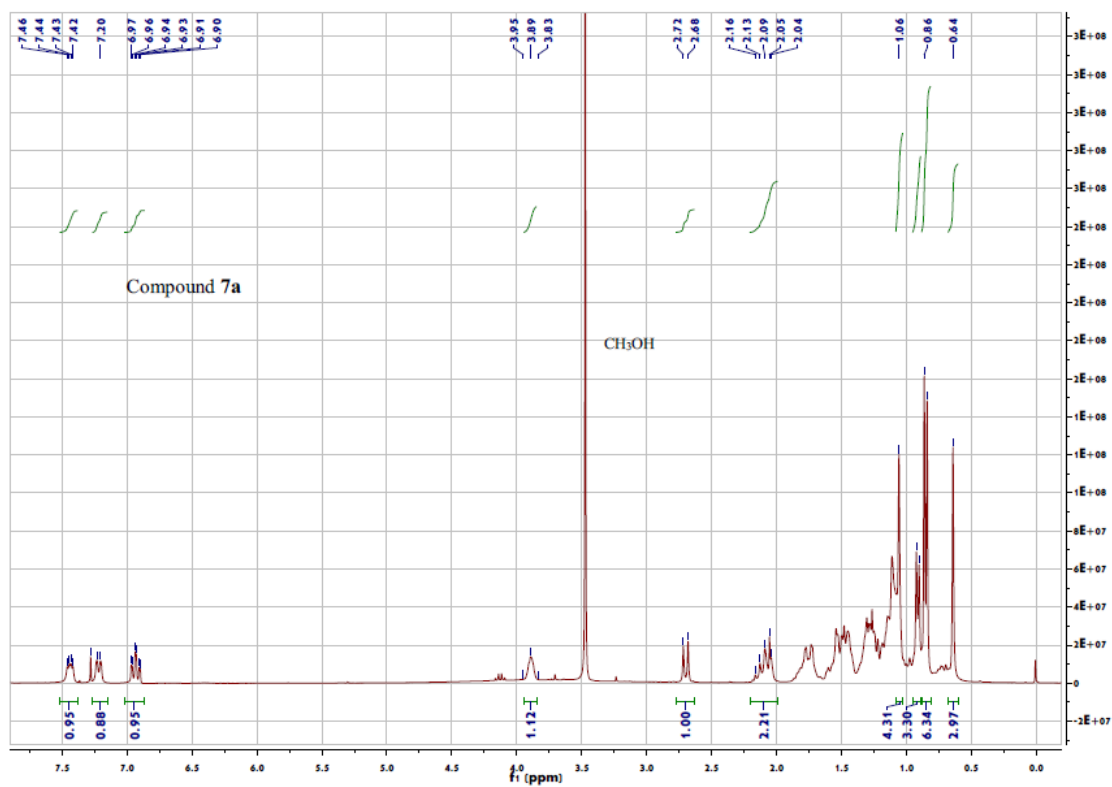

Figure S2. Compound 7a  $^1\text{H}$  NMR.

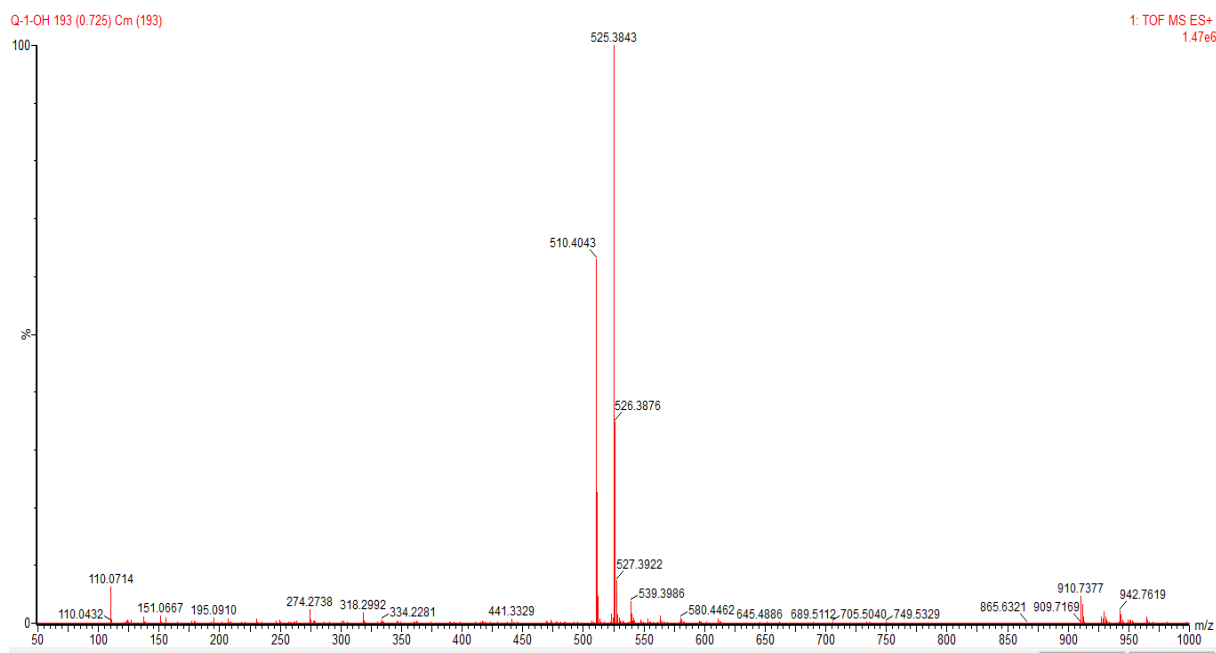

Figure S3. Compound 7a HREIMS.

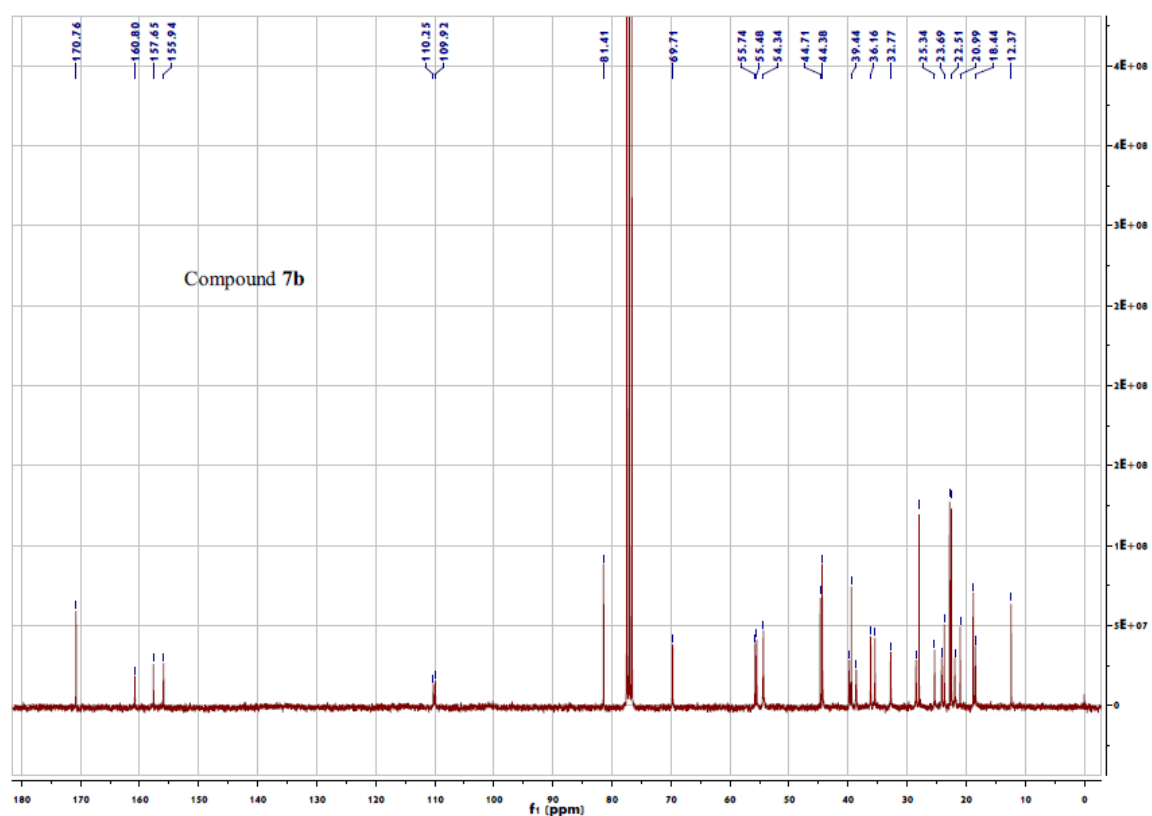Figure S4. Compound 7b <sup>13</sup>C NMR.

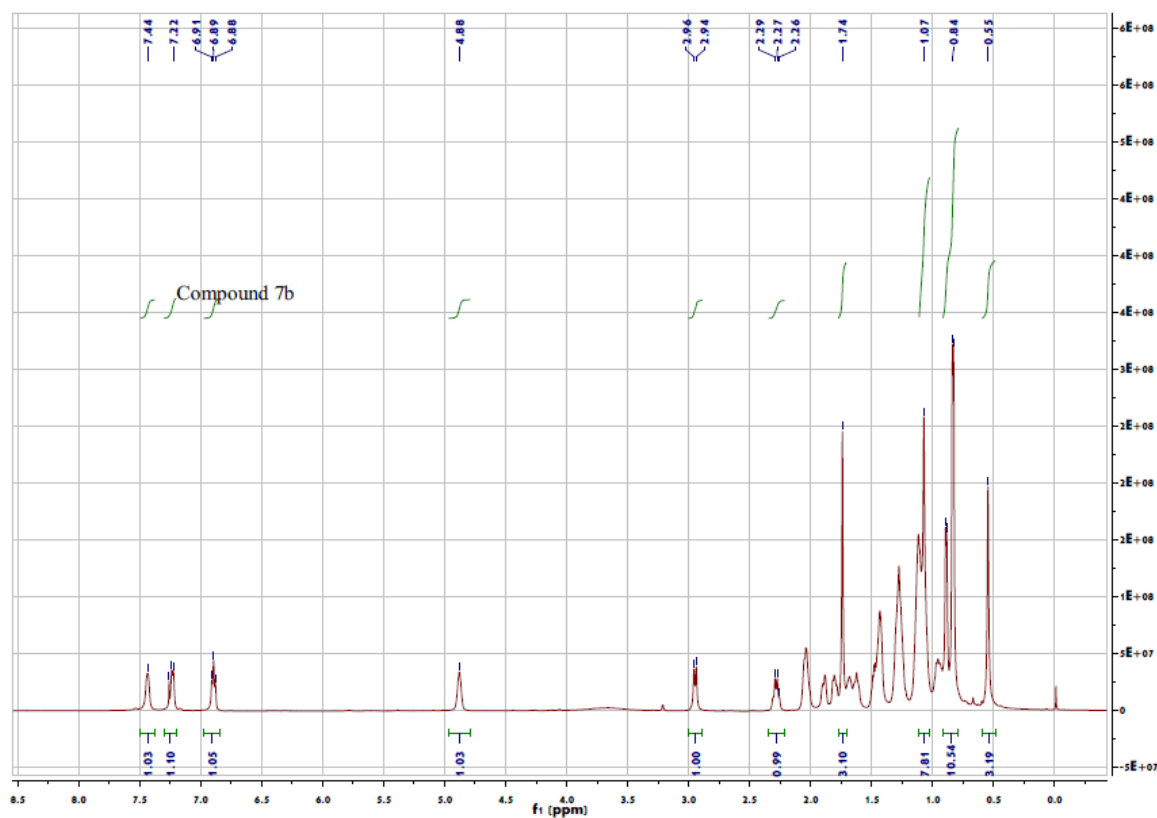Figure S5. Compound 7b  $^1\text{H}$  NMR.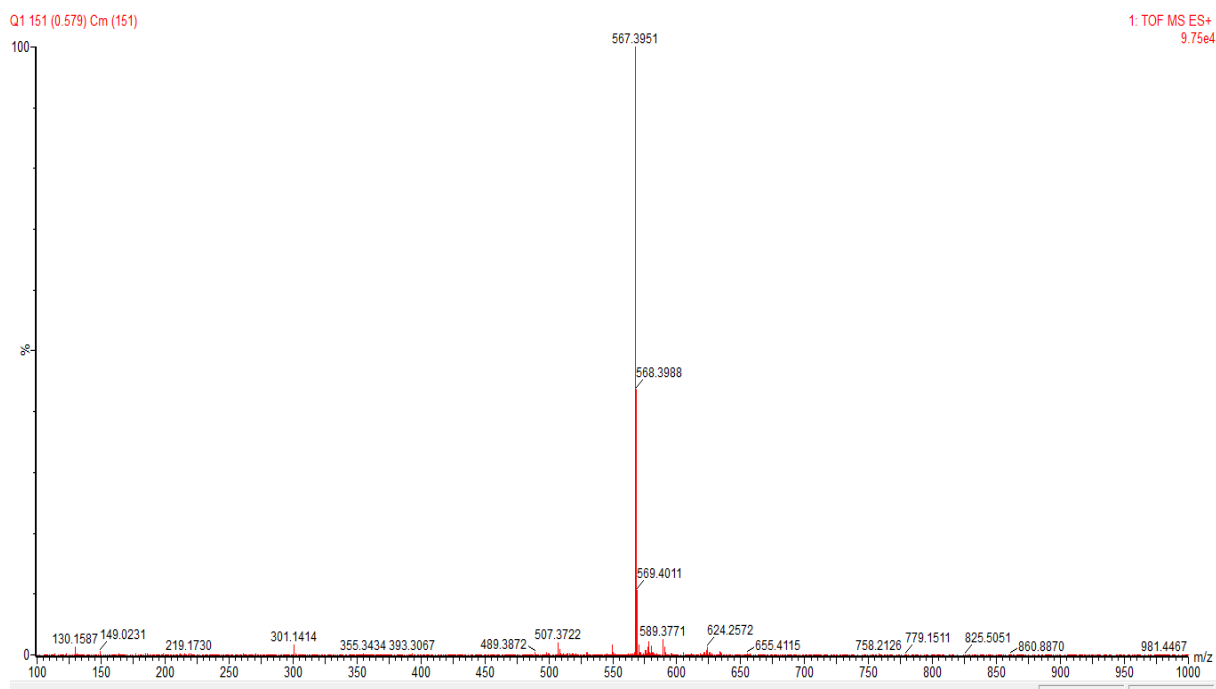

Figure S6. Compound 7b HREIMS.

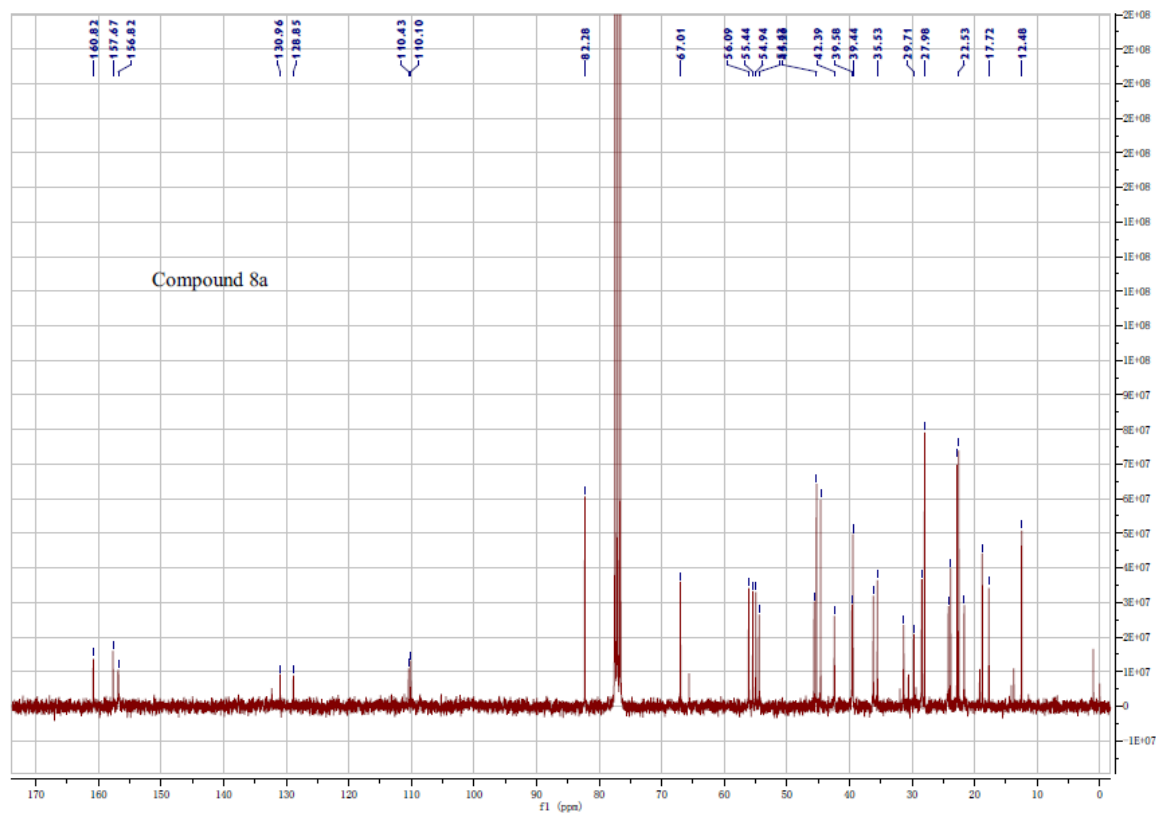Figure S7. Compound 8a <sup>13</sup>C NMR.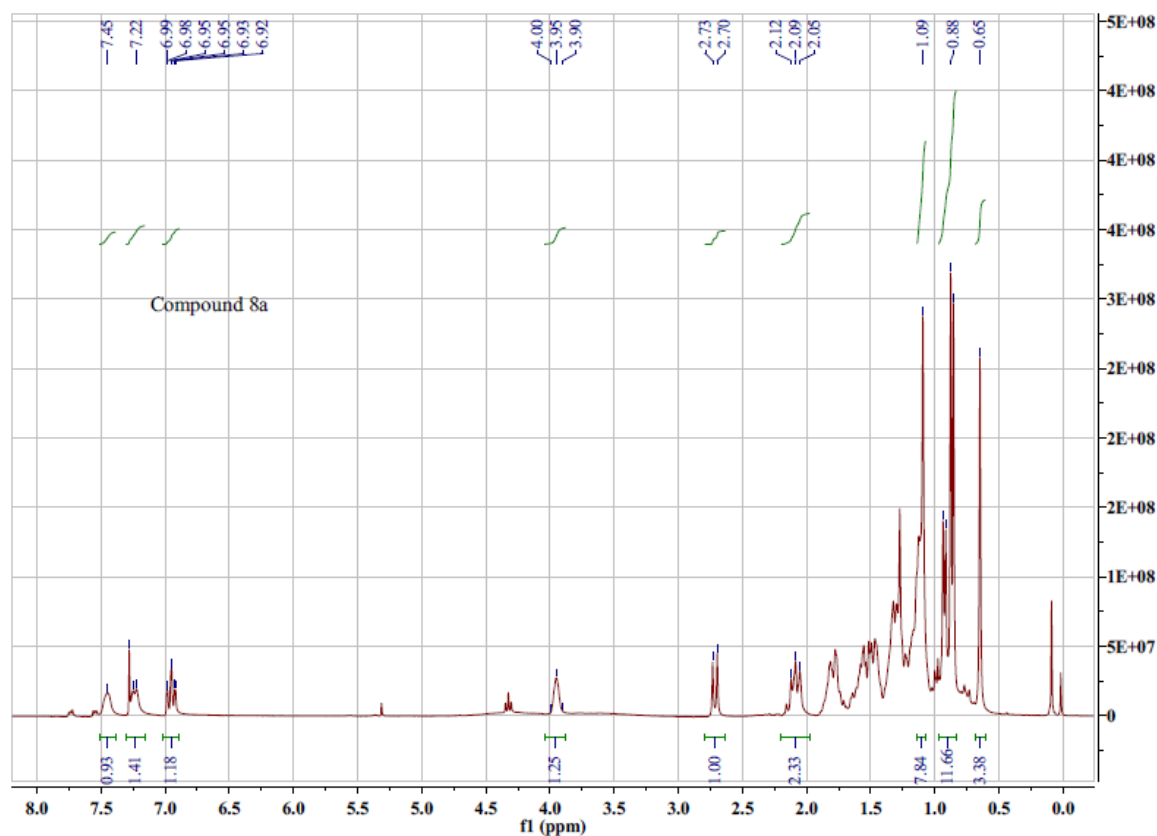Figure S8. Compound 8a <sup>1</sup>H NMR.

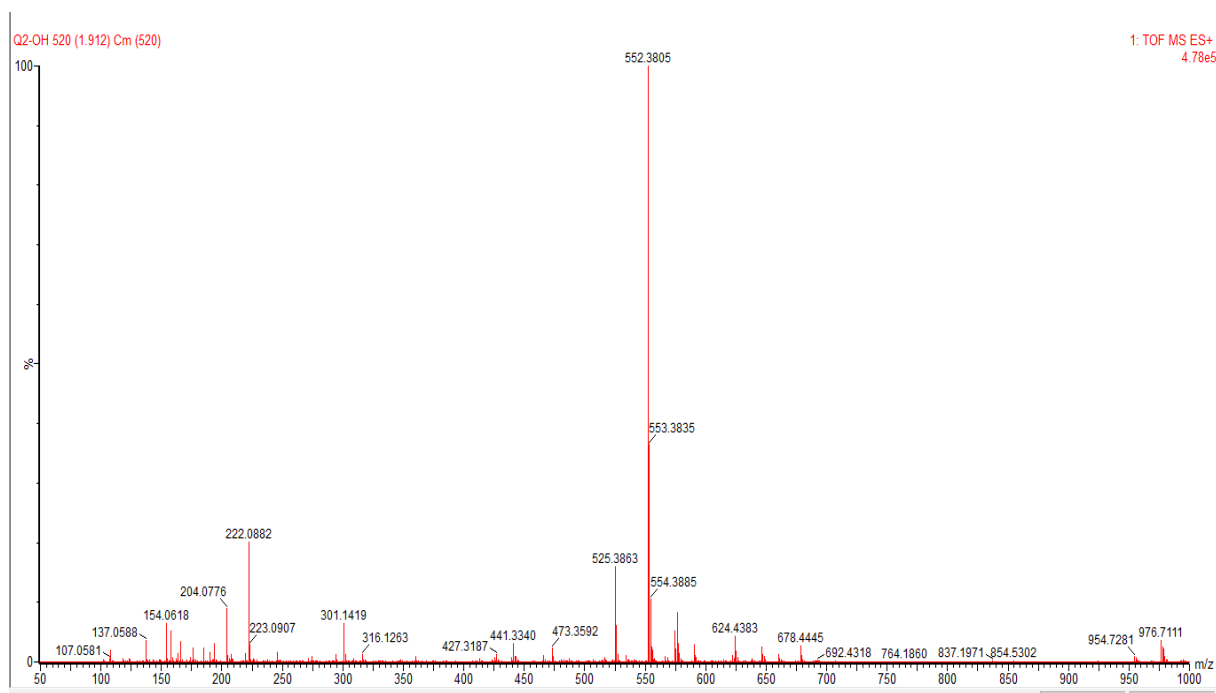

Figure S9. Compound 8a REIMS.

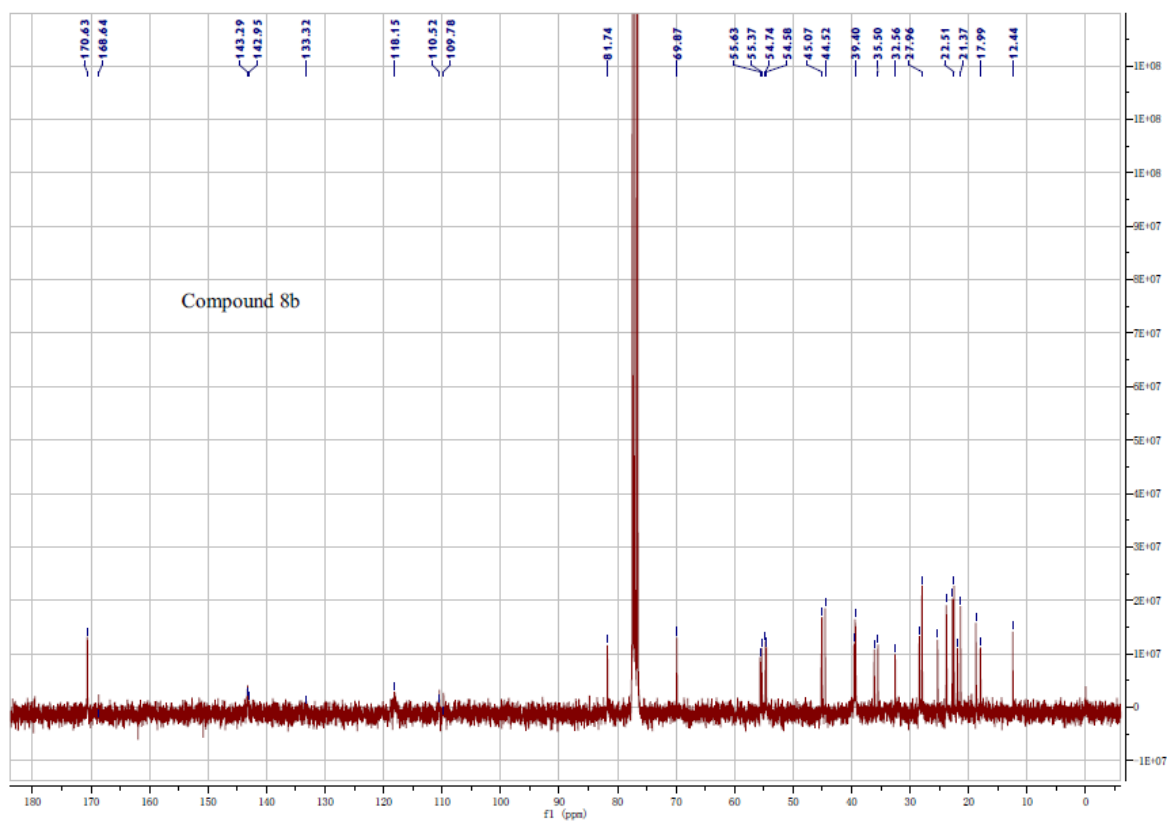Figure S10. Compound 8b  $^{13}\text{C}$  NMR.

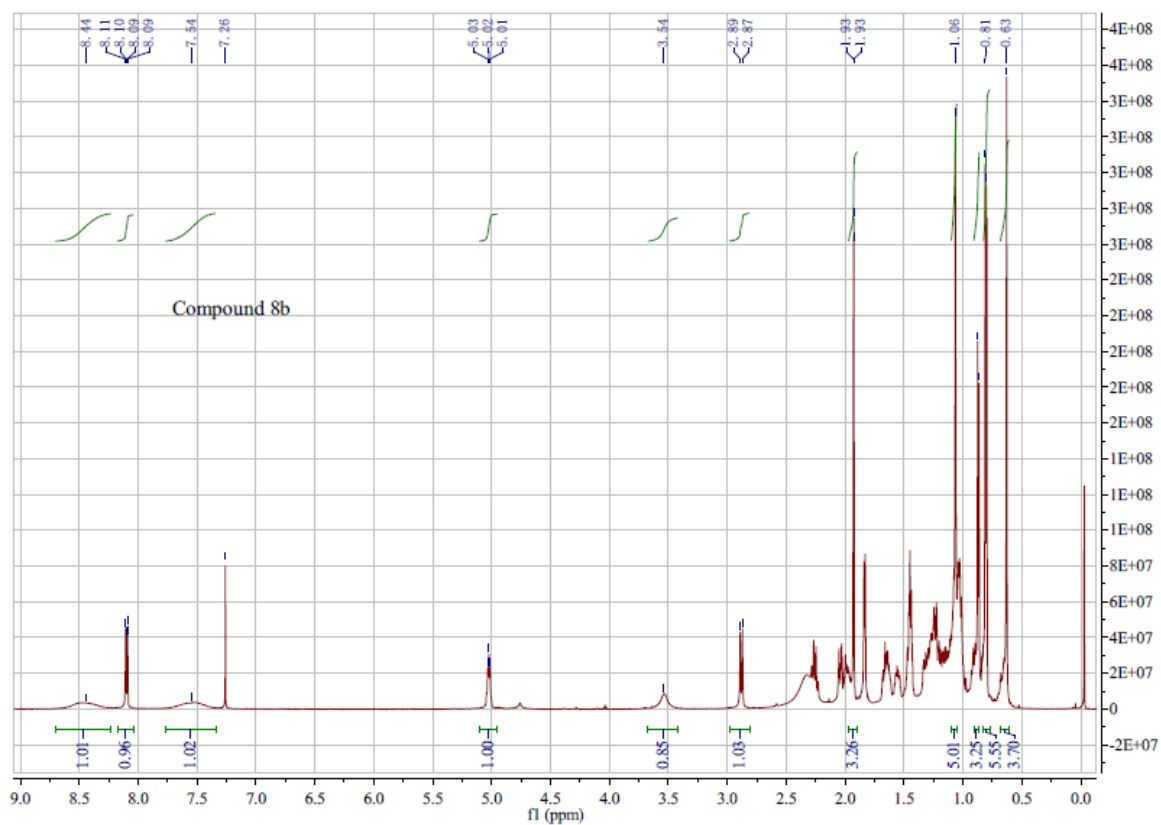

Figure S11. Compound **8b**  $^1\text{H}$  NMR.

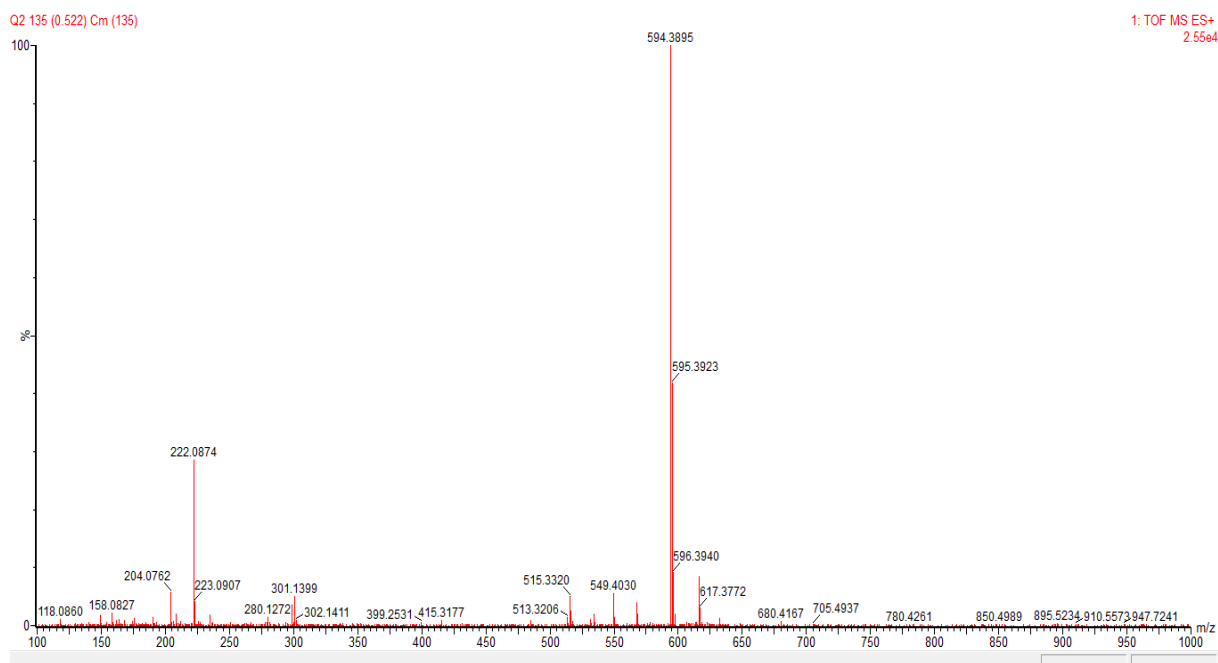

Figure S12. Compound **8b** HREIMS.

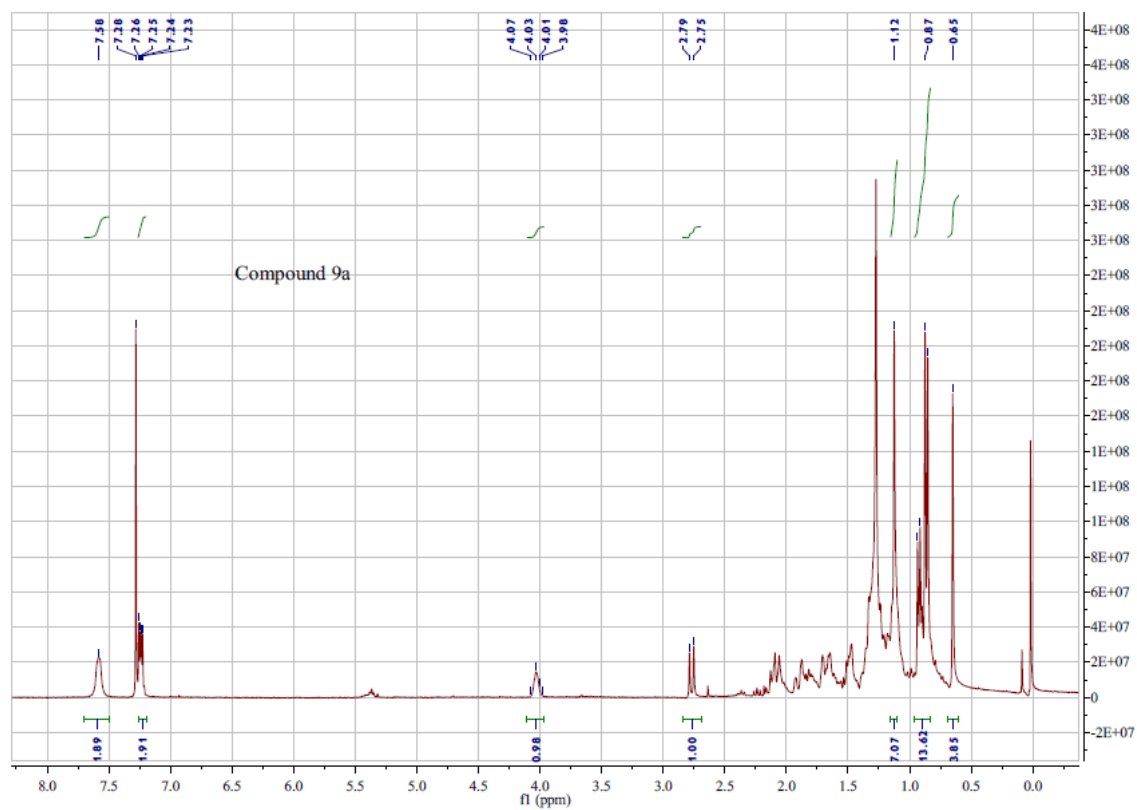Figure S13. Compound 9a <sup>1</sup>H NMR.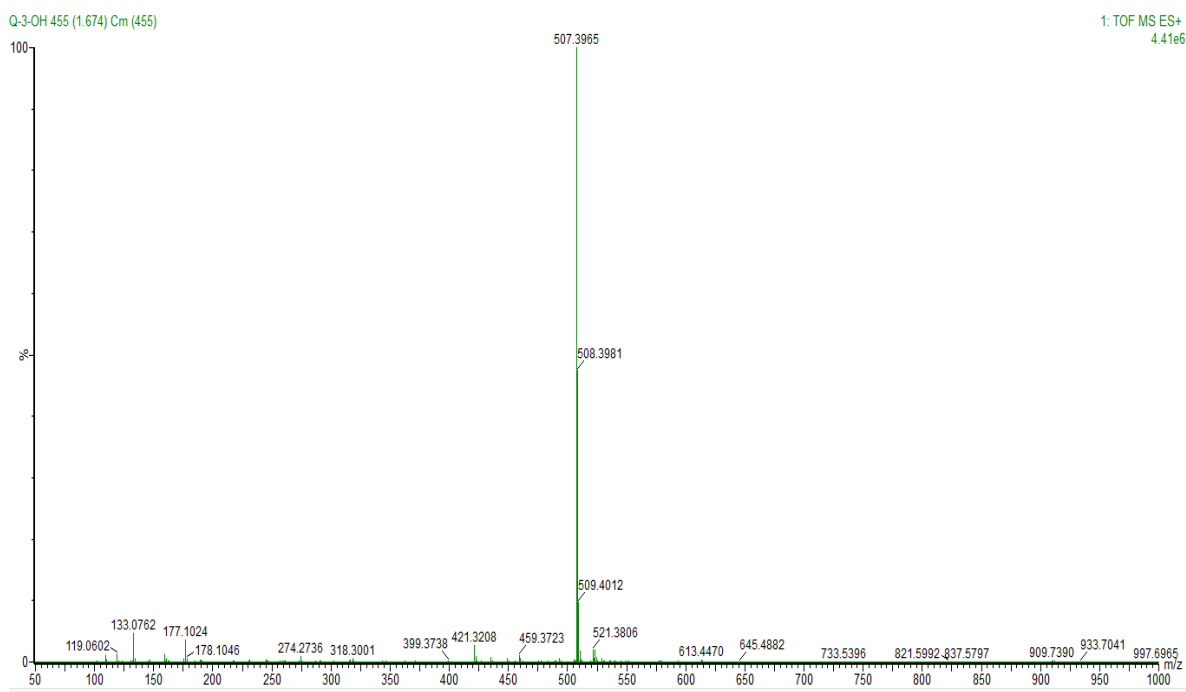

Figure S14. Compound 9a HREIMS.

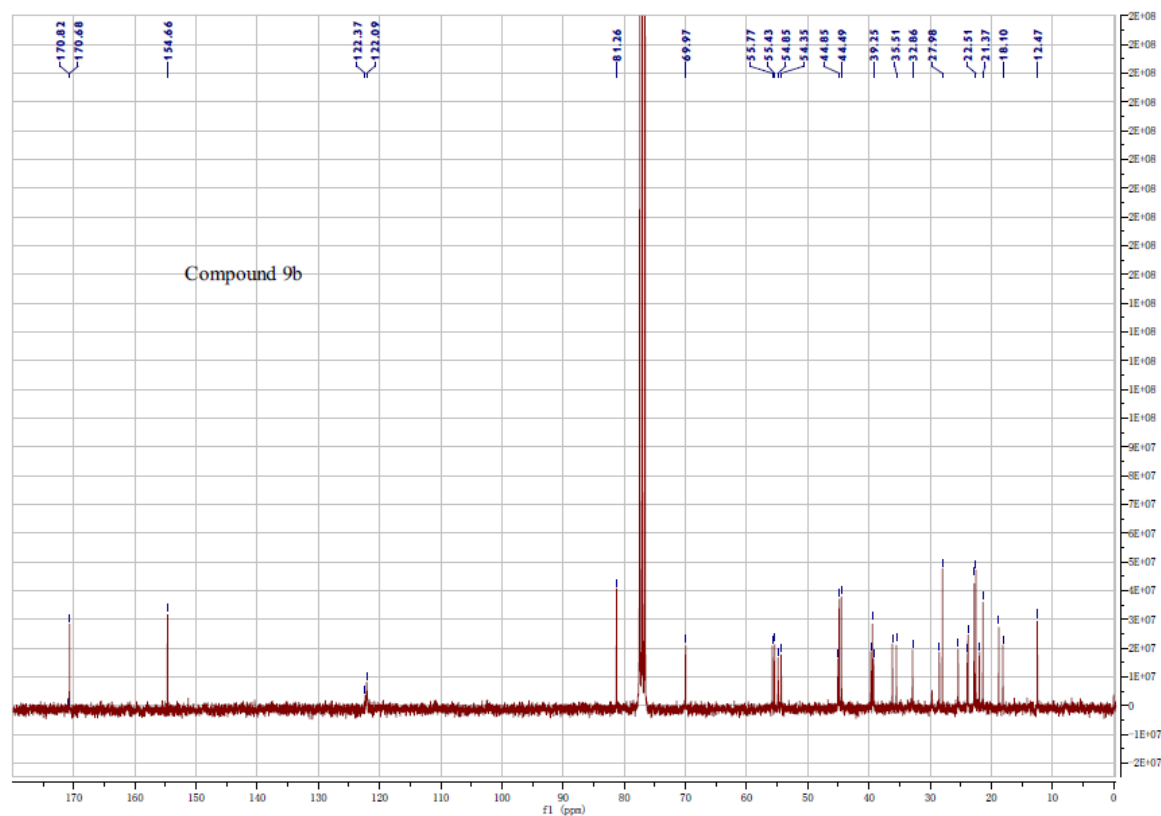Figure S15. Compound 9b <sup>13</sup>C NMR.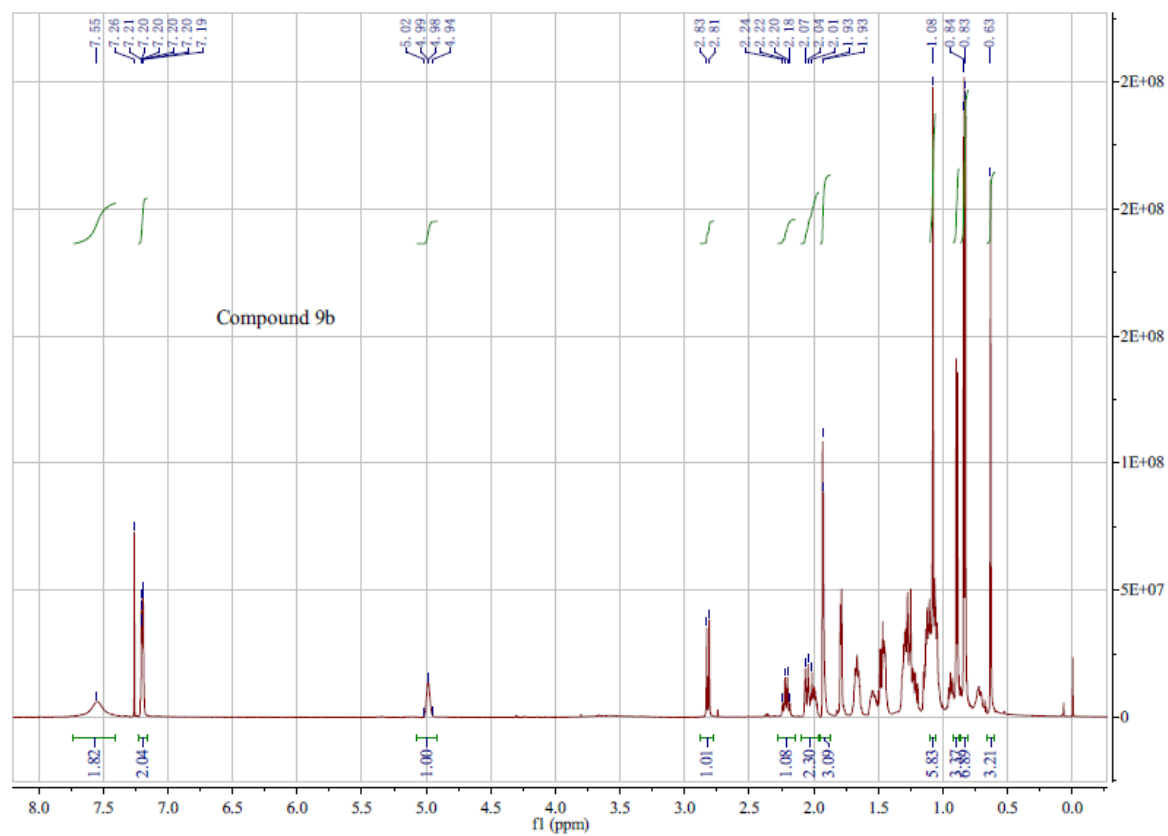Figure S16. Compound 9b <sup>1</sup>H NMR.

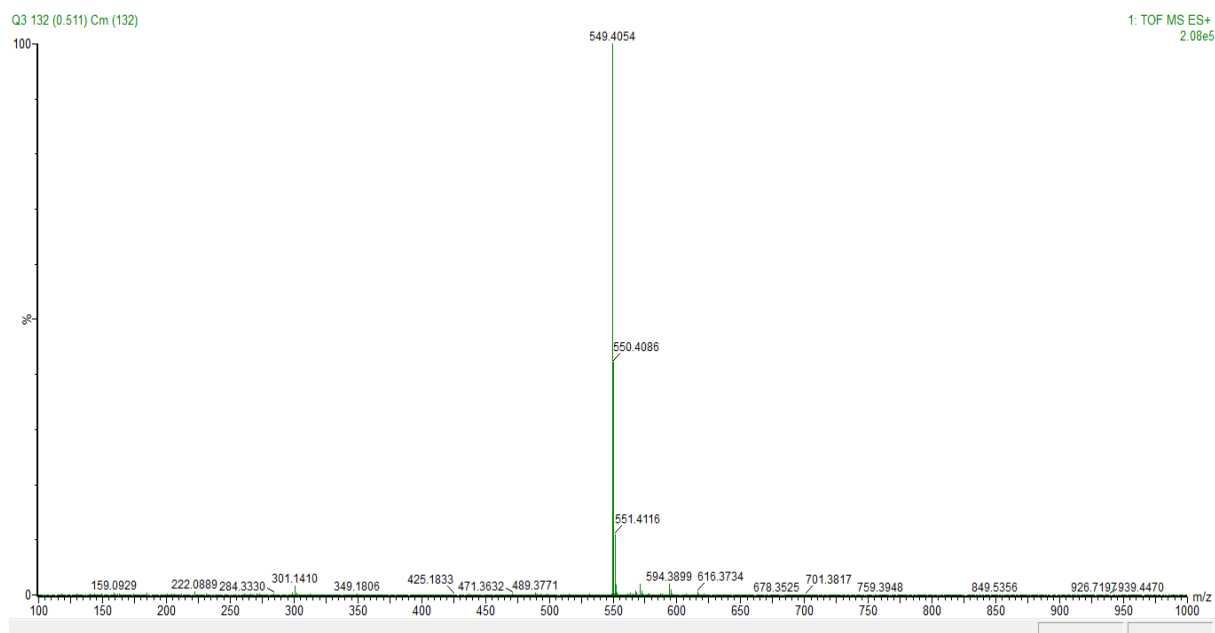

Figure S17. Compound 9b HREIMS.

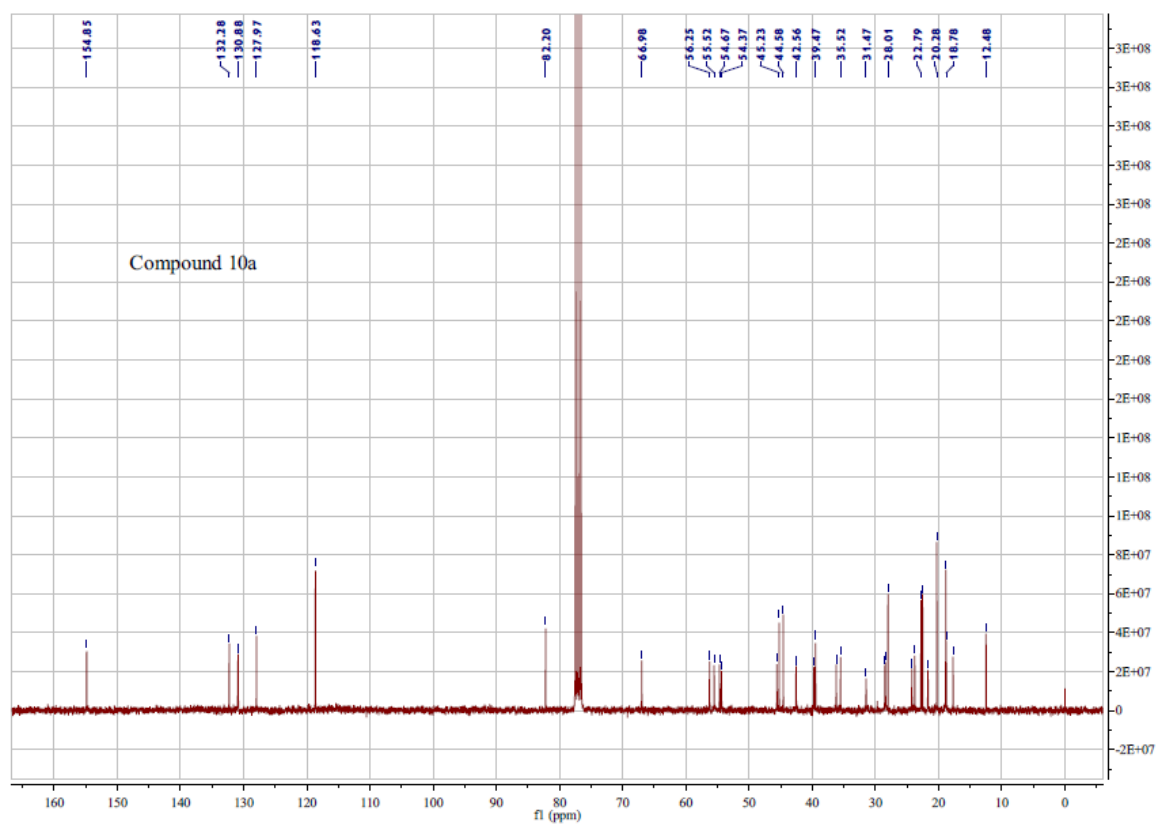Figure S18. Compound 10a <sup>13</sup>C NMR.

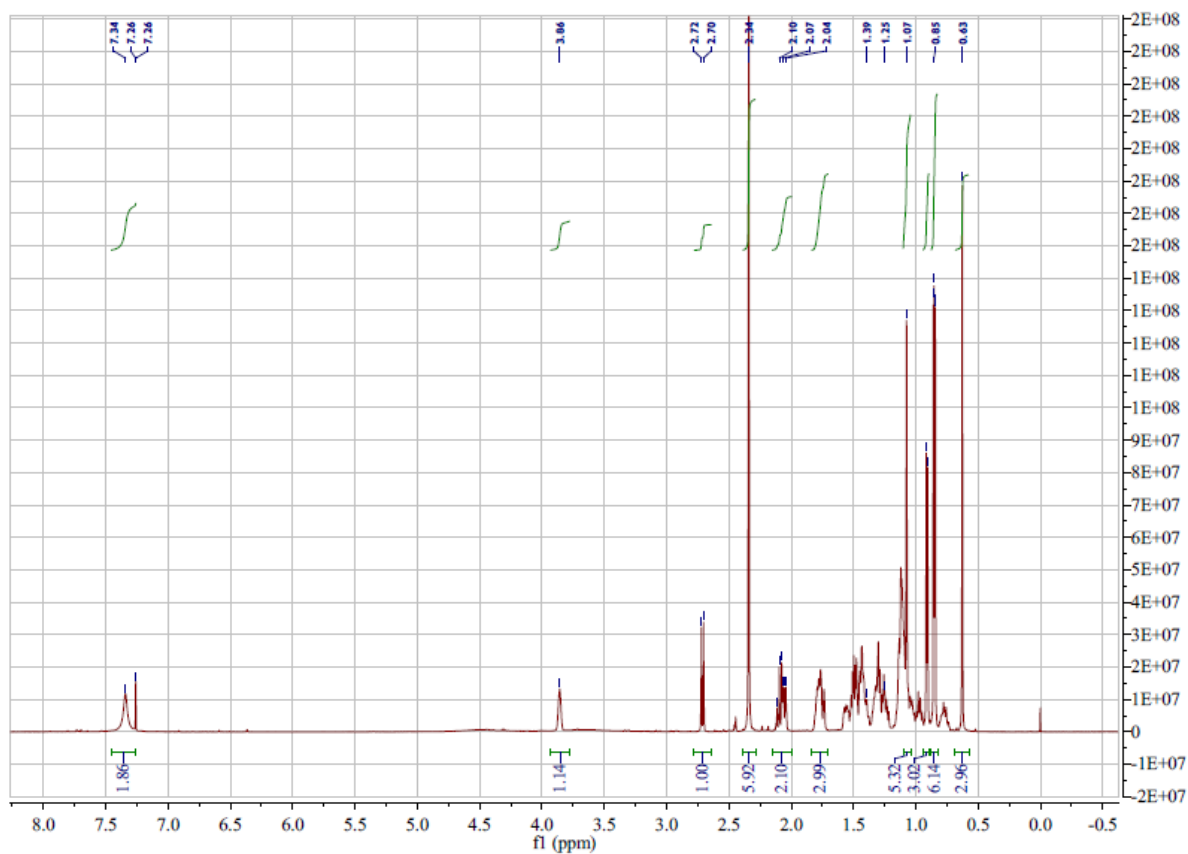

**Figure S19.** Compound 10a <sup>1</sup>H NMR.

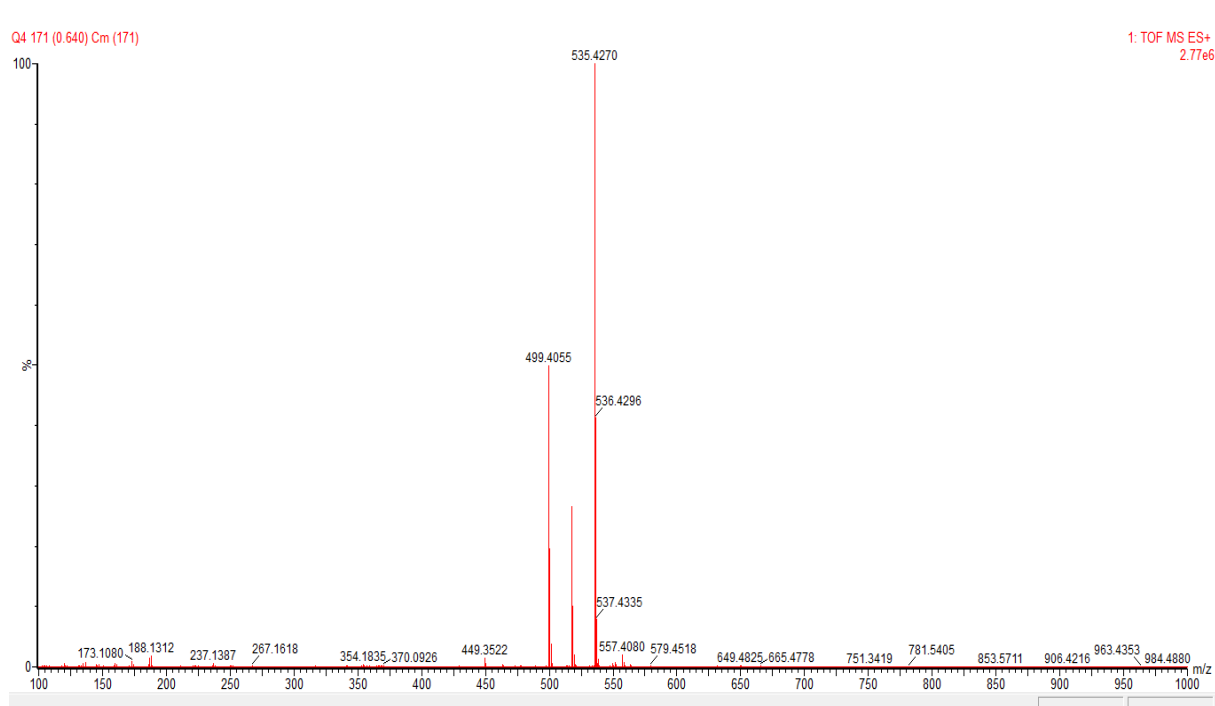**Figure S20.** Compound 10a HREIMS.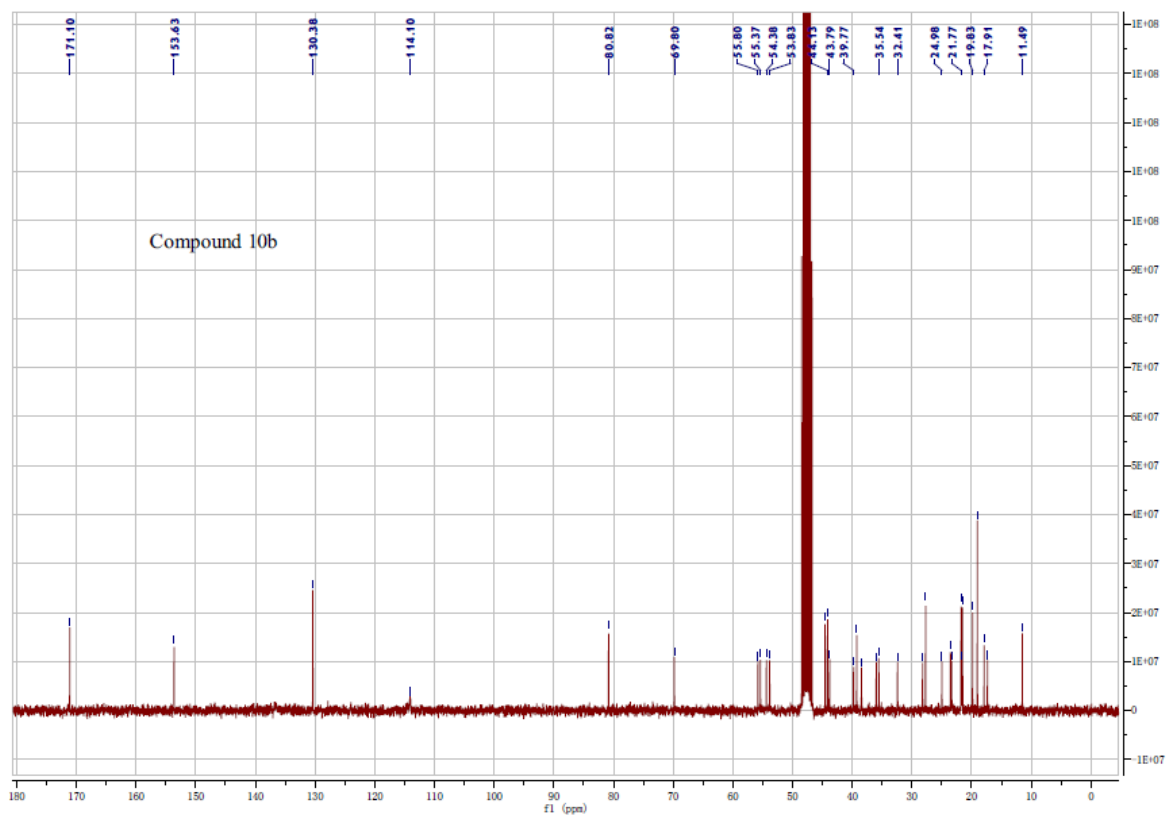**Figure S21.** Compound 10b  $^{13}\text{C}$  NMR.

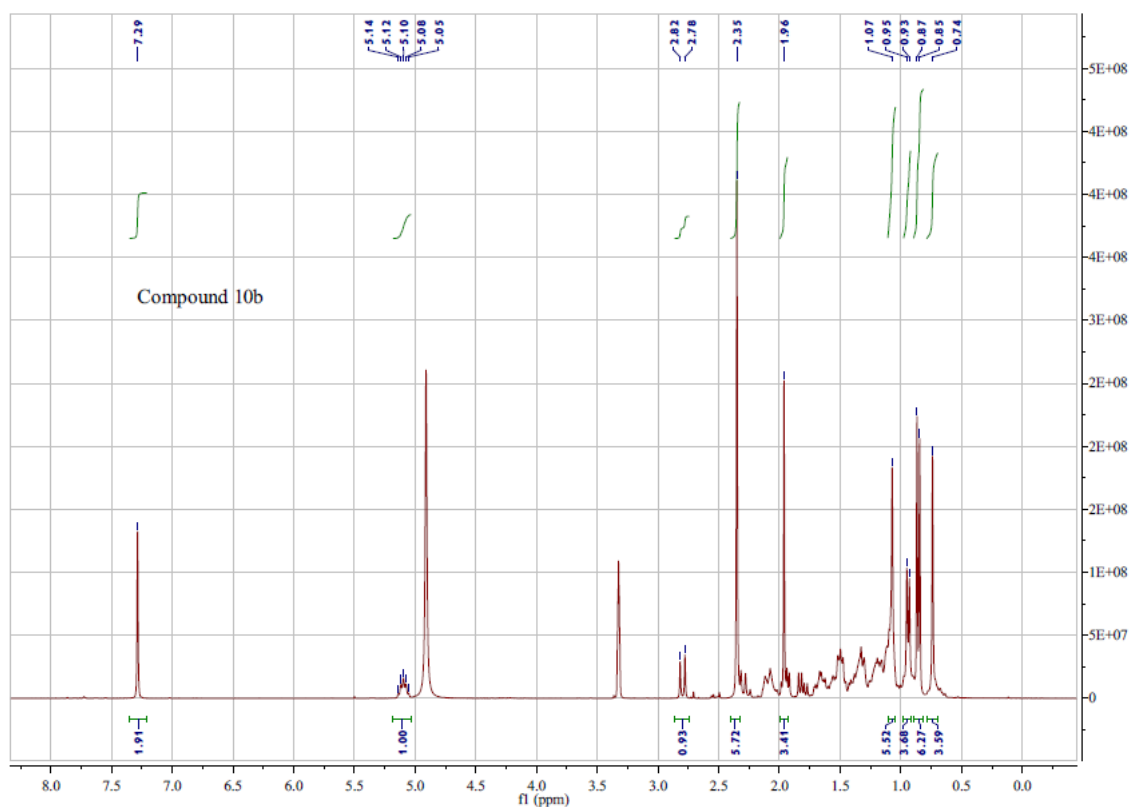

Figure S22. Compound 10b  $^1\text{H}$  NMR.

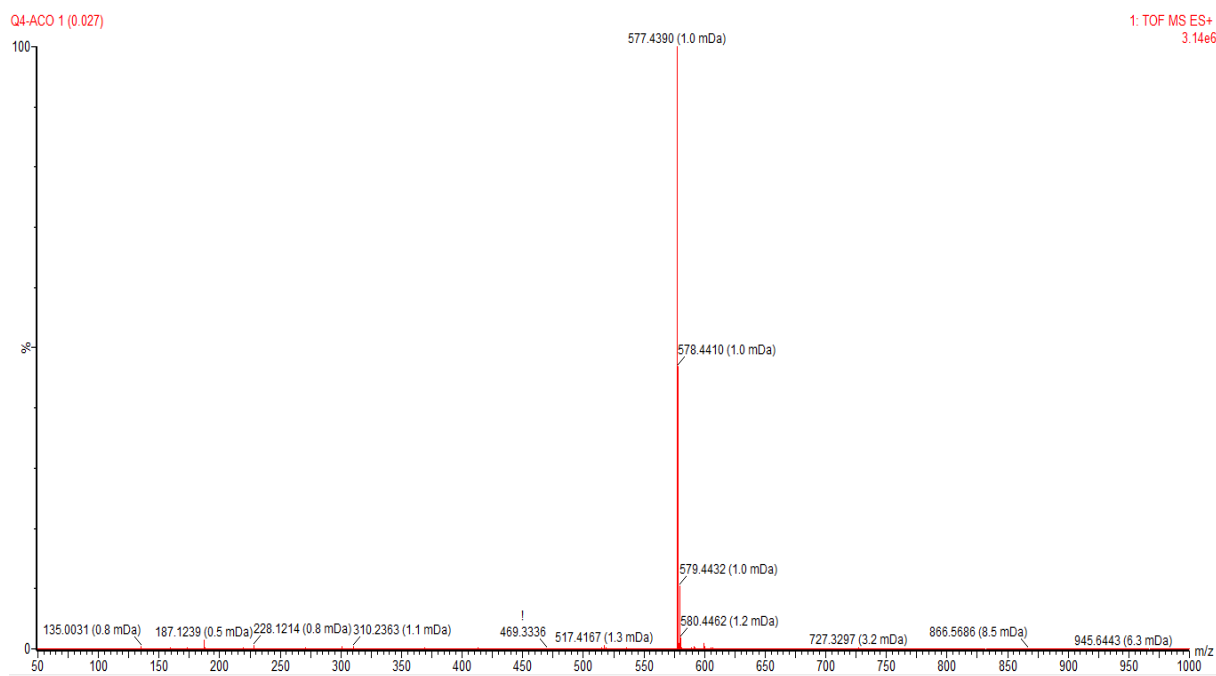

Figure S23. Compound 10b HREIMS.

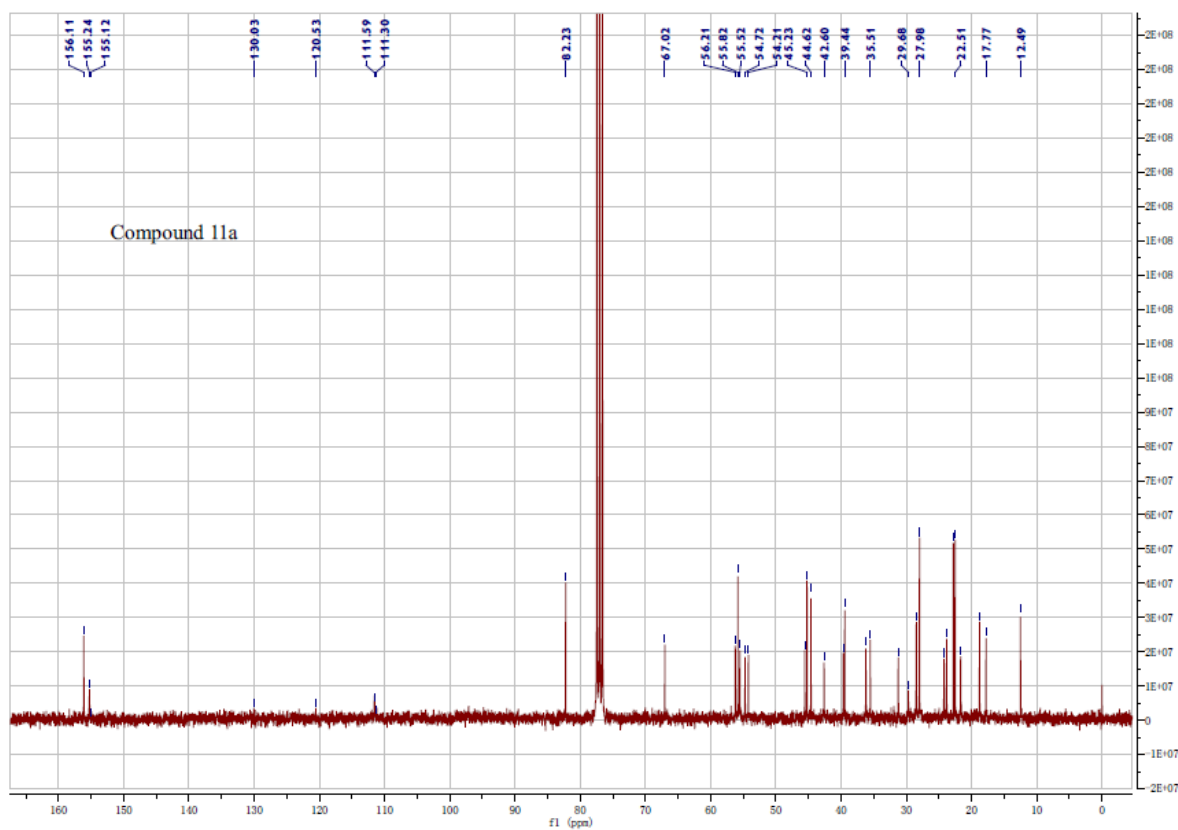Figure S24. Compound 11a  $^{13}\text{C}$  NMR.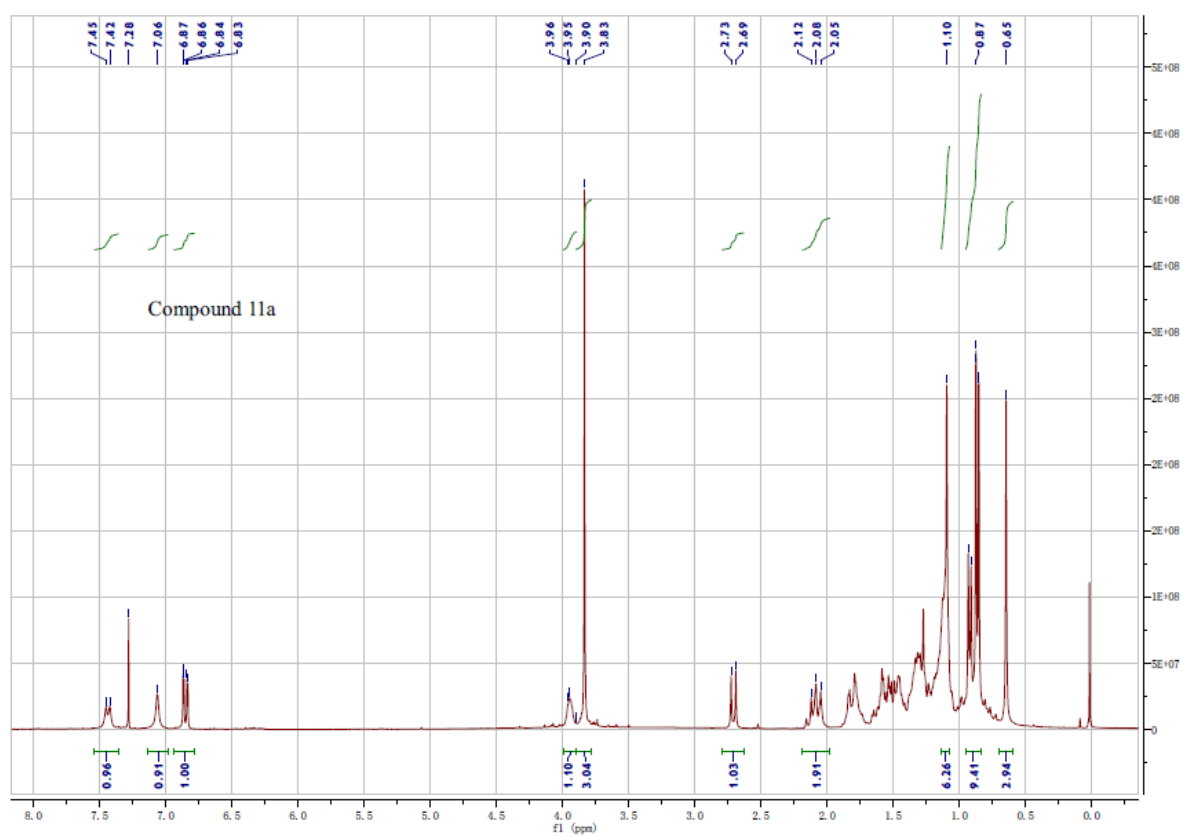Figure S25. Compound 11a  $^1\text{H}$  NMR.

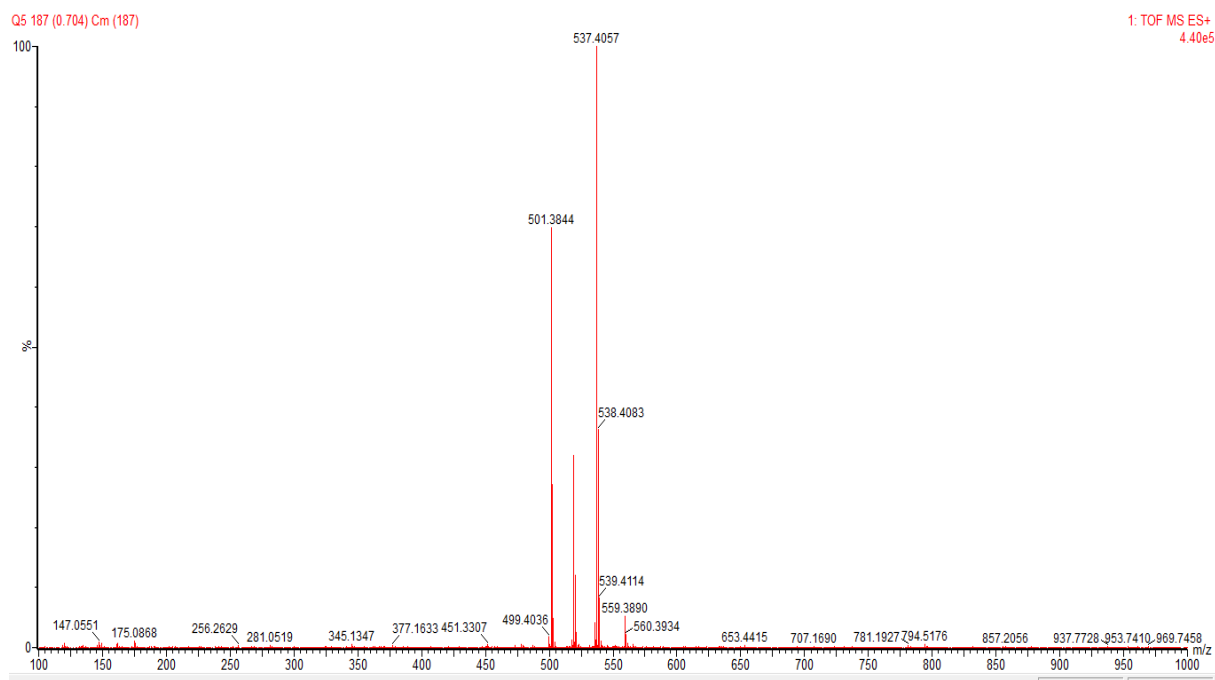

Figure S26. Compound 11a HREIMS.

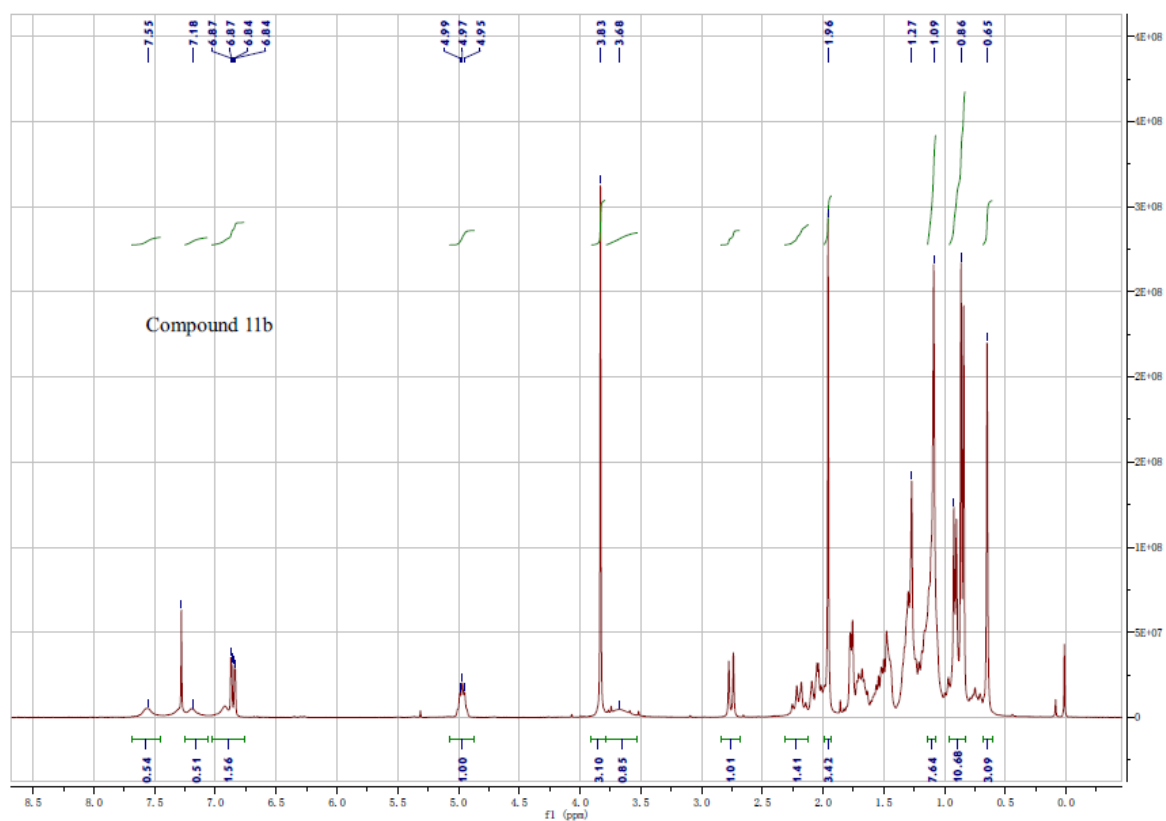Figure S27. Compound 11b  $^1\text{H}$  NMR.

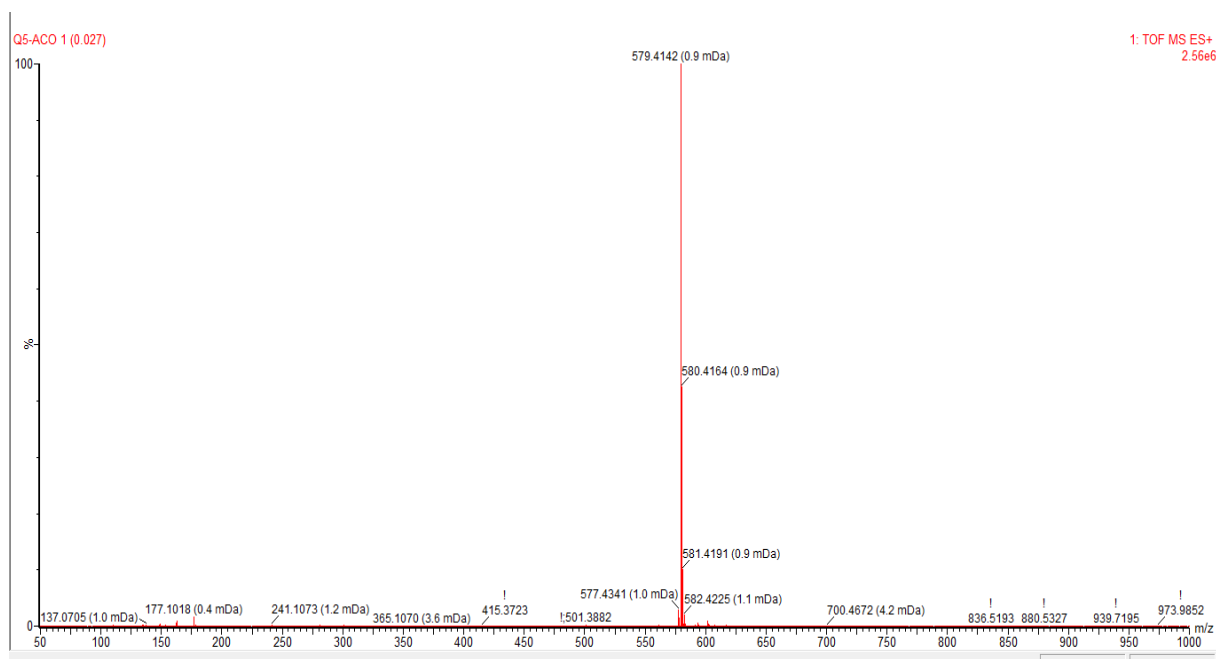

Figure S28. Compound 11b HREIMS.

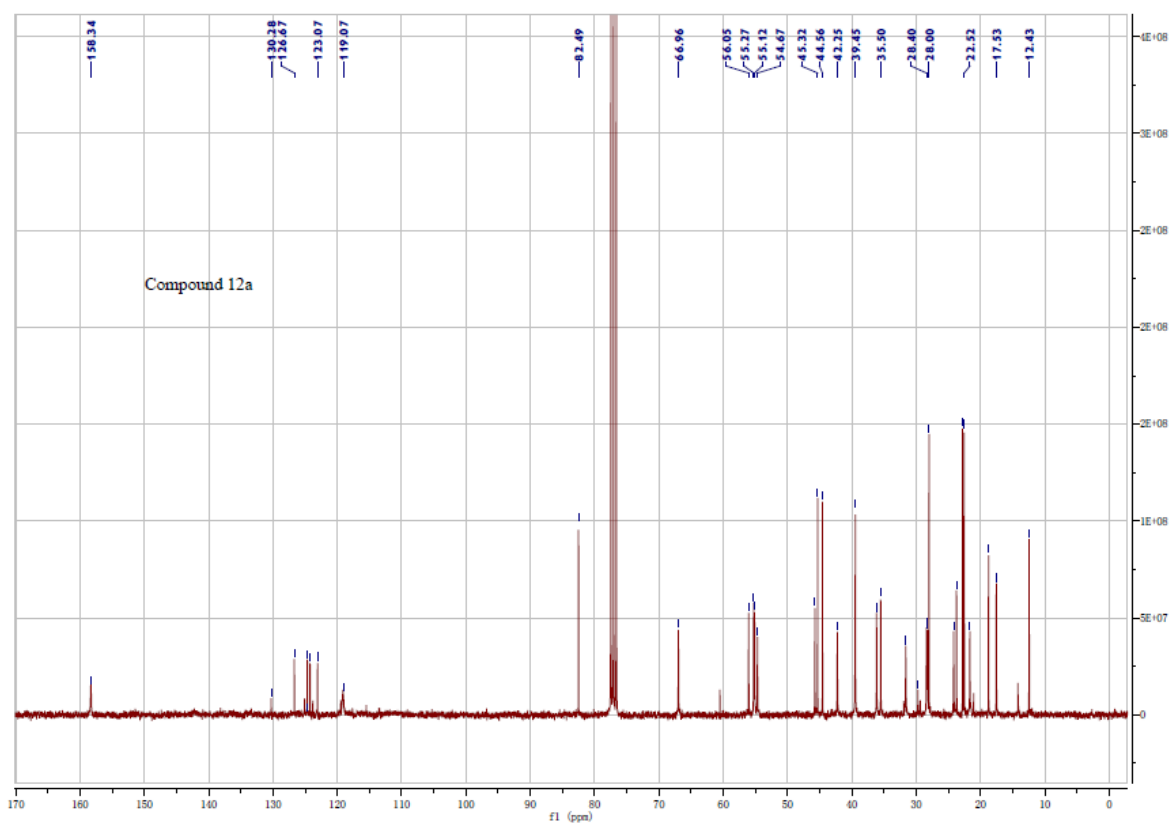Figure S29. Compound 12a  $^{13}\text{C}$  NMR.

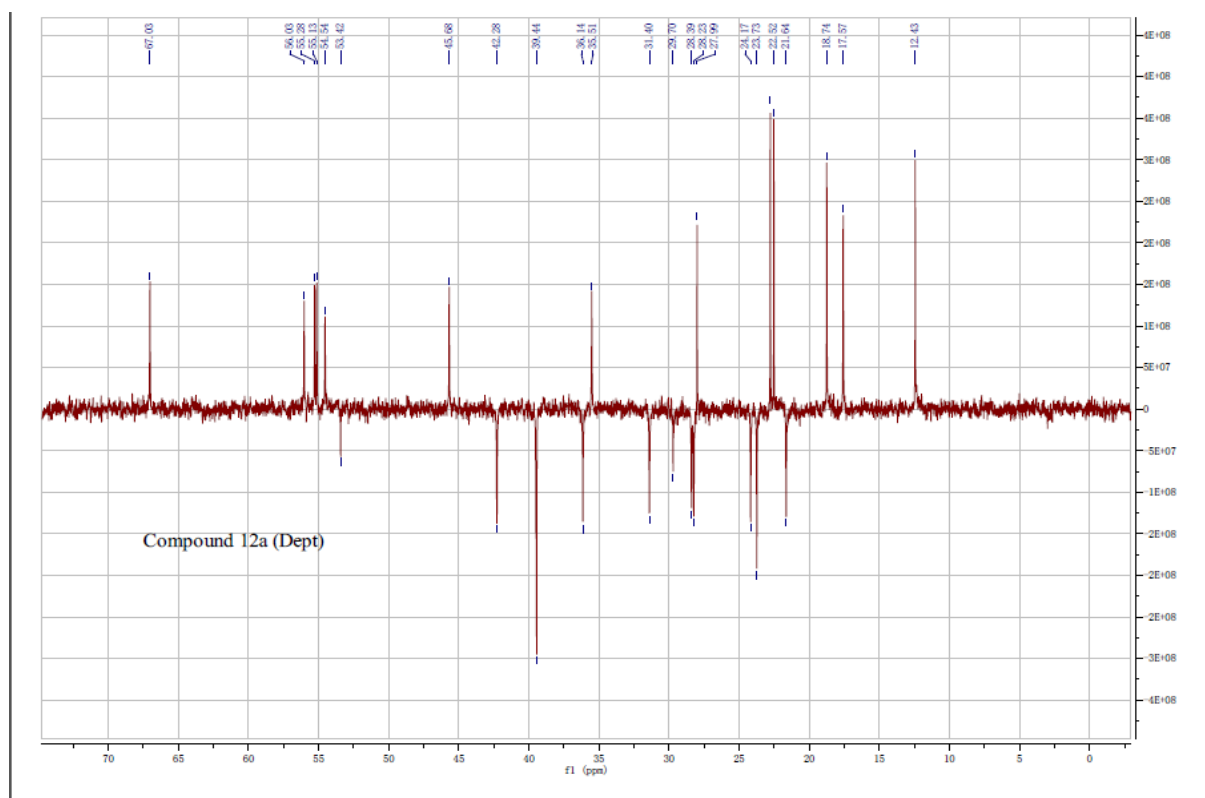**Figure S30.** Compound 12a  $^{13}\text{C}$  NMR (DEPT).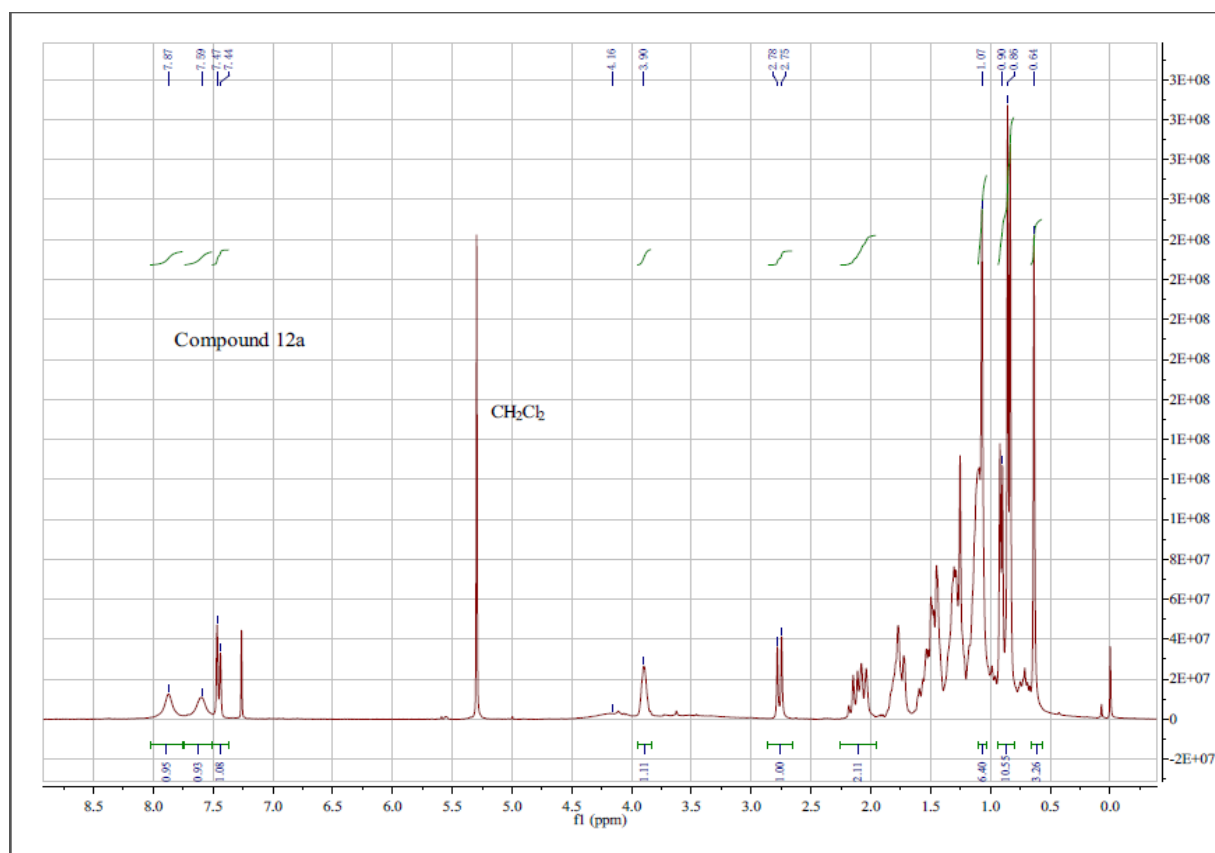**Figure S31.** Compound 12a  $^1\text{H}$  NMR.

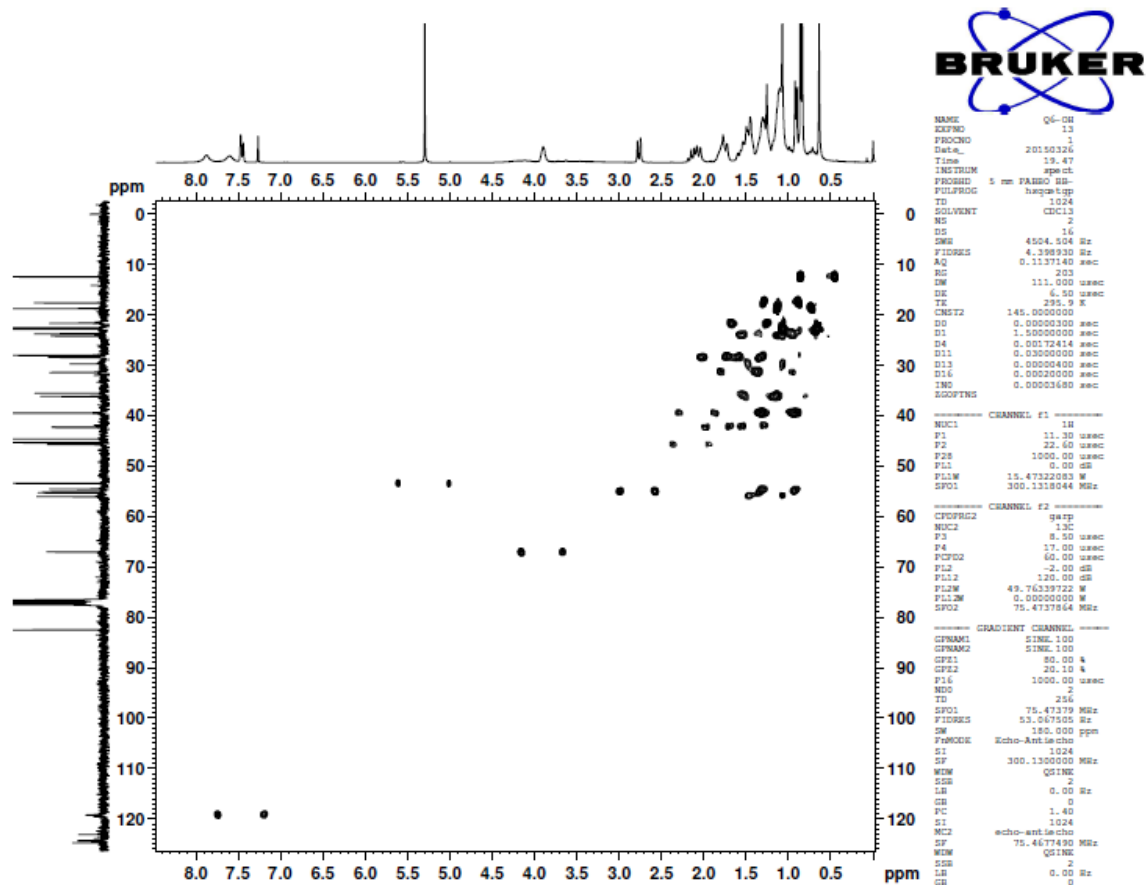

Figure S32. Compound 12a HMQC.

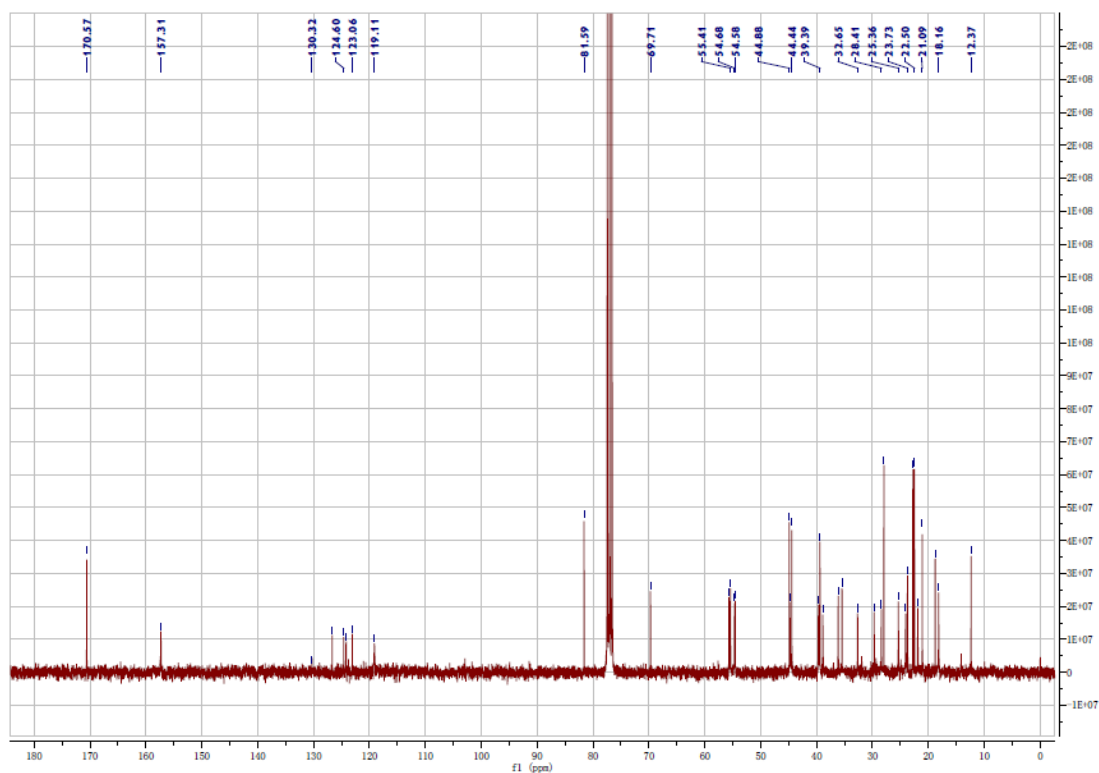Figure S33. Compound 12b  $^{13}\text{C}$  NMR.

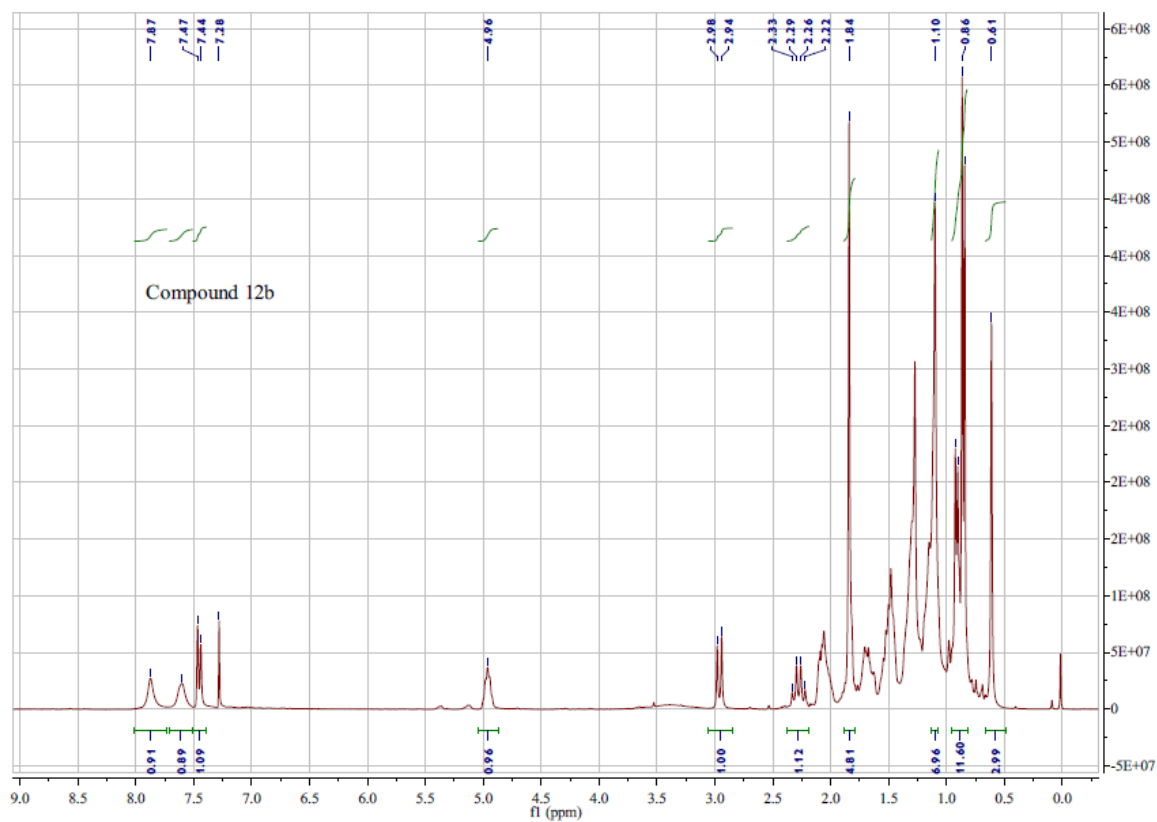Figure S34. Compound 12b  $^1\text{H}$  NMR.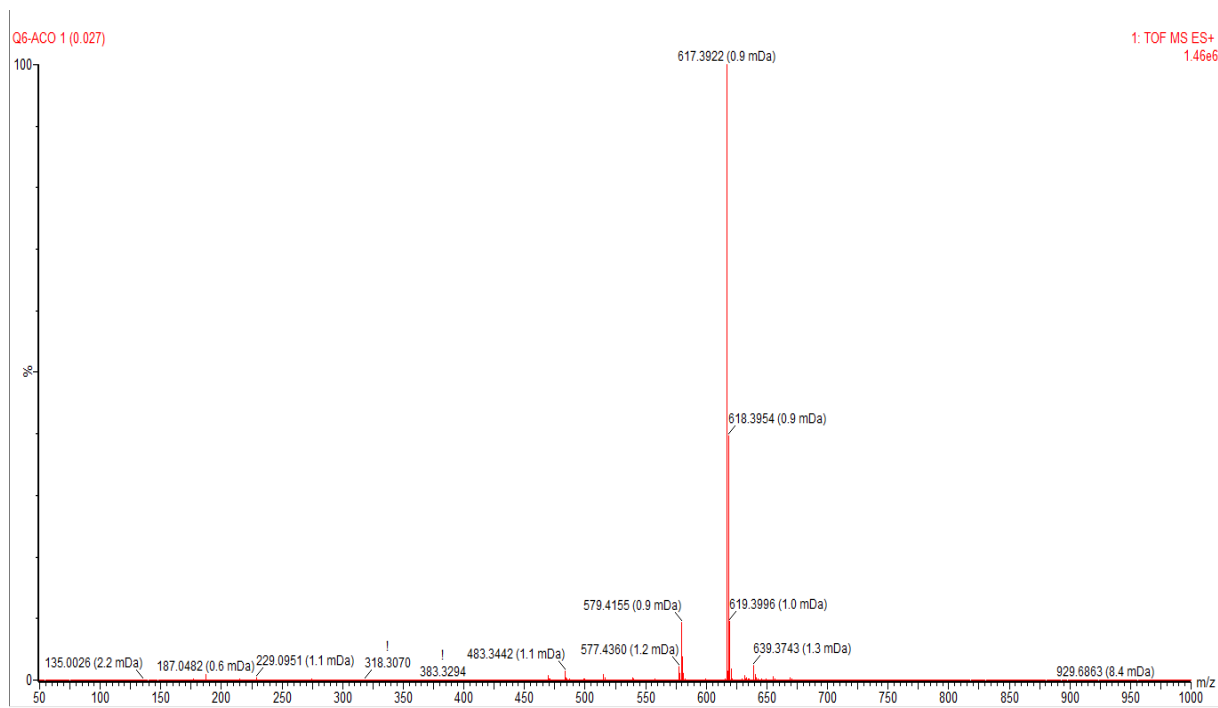

Figure S35. Compound 12b HREIMS.

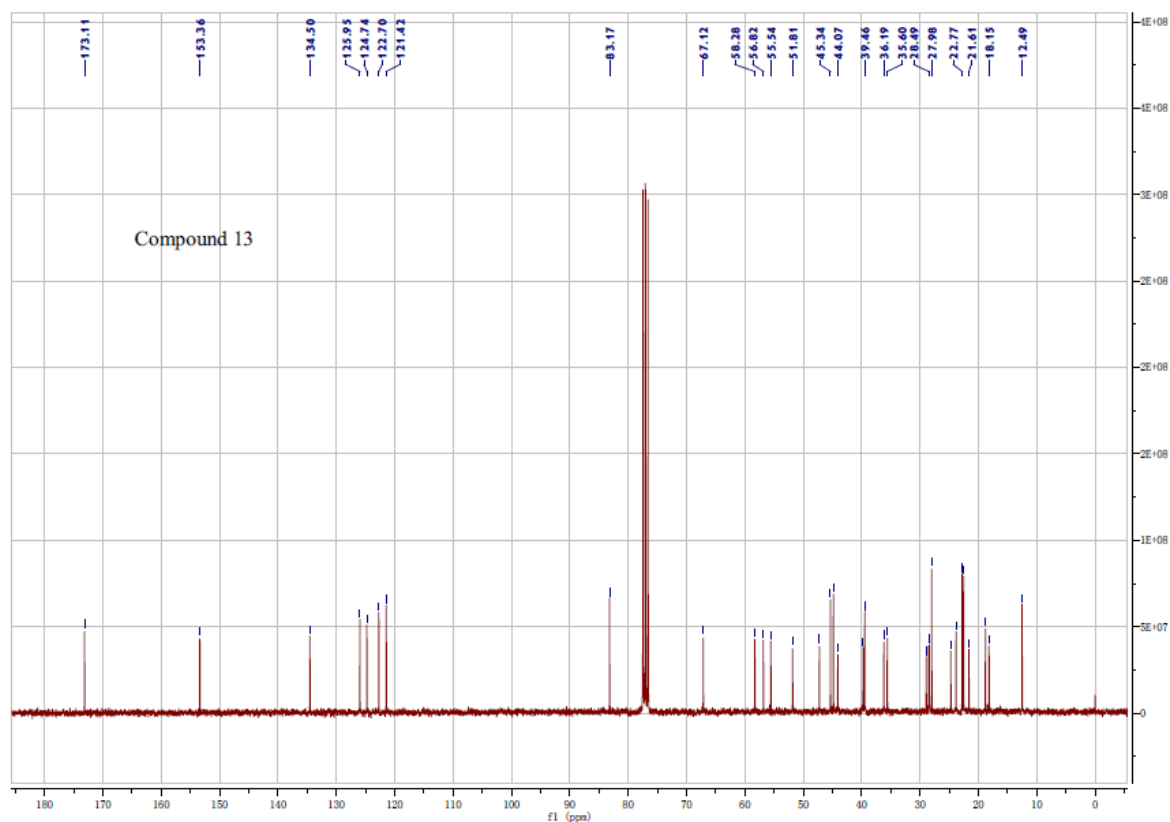Figure S36. Compound 13 <sup>13</sup>C NMR.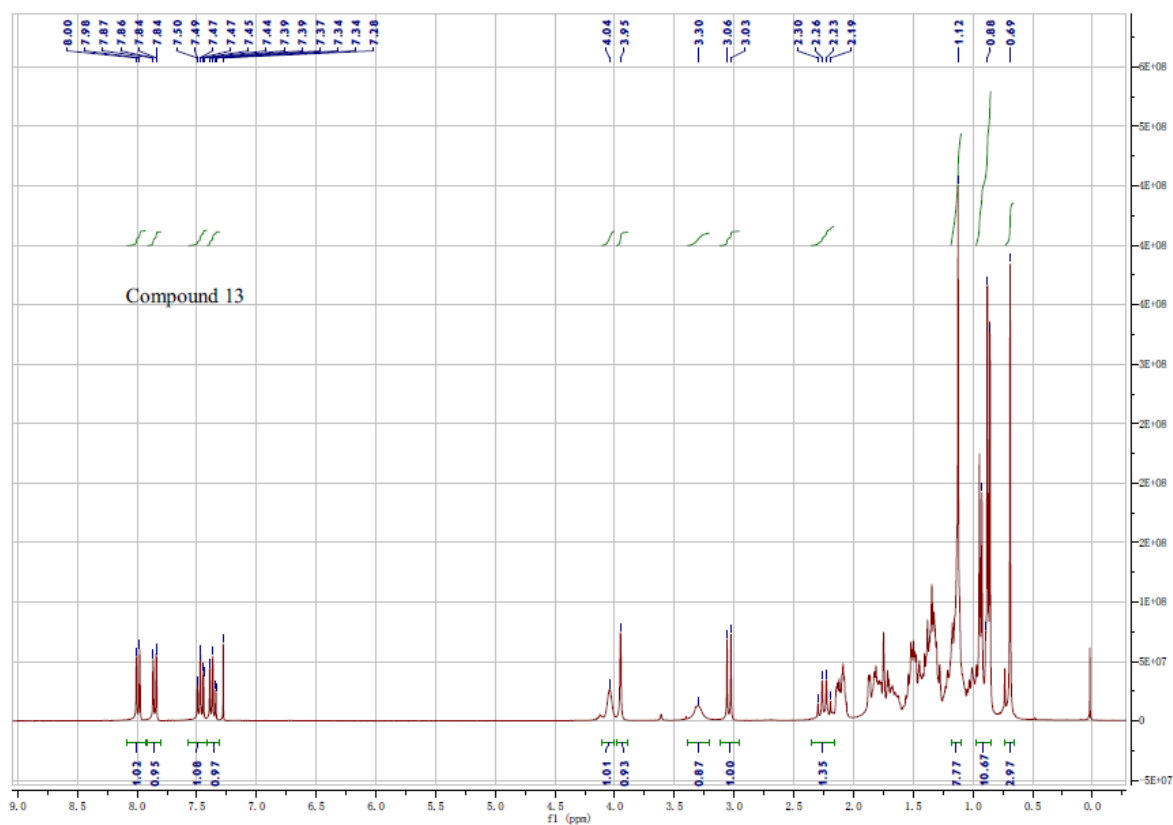Figure S37. Compound 13 <sup>1</sup>H NMR.

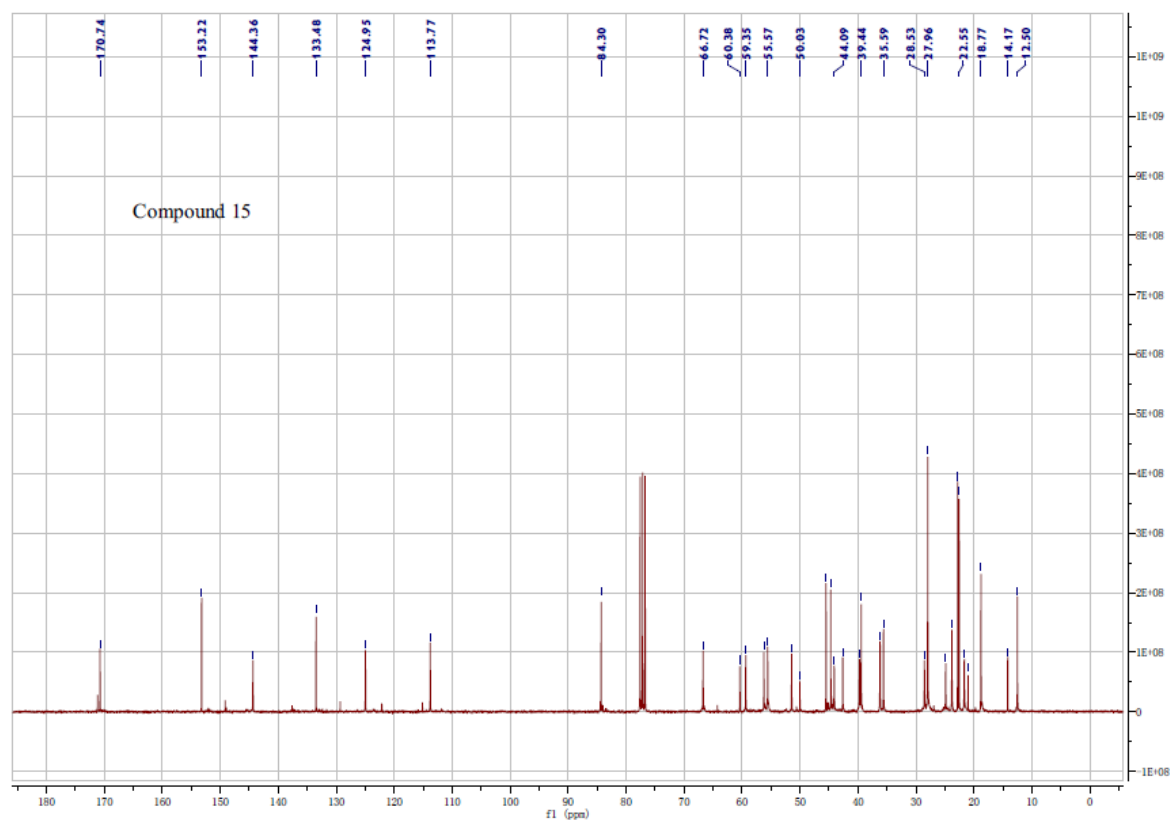Figure S38. Compound 15 <sup>13</sup>C NMR.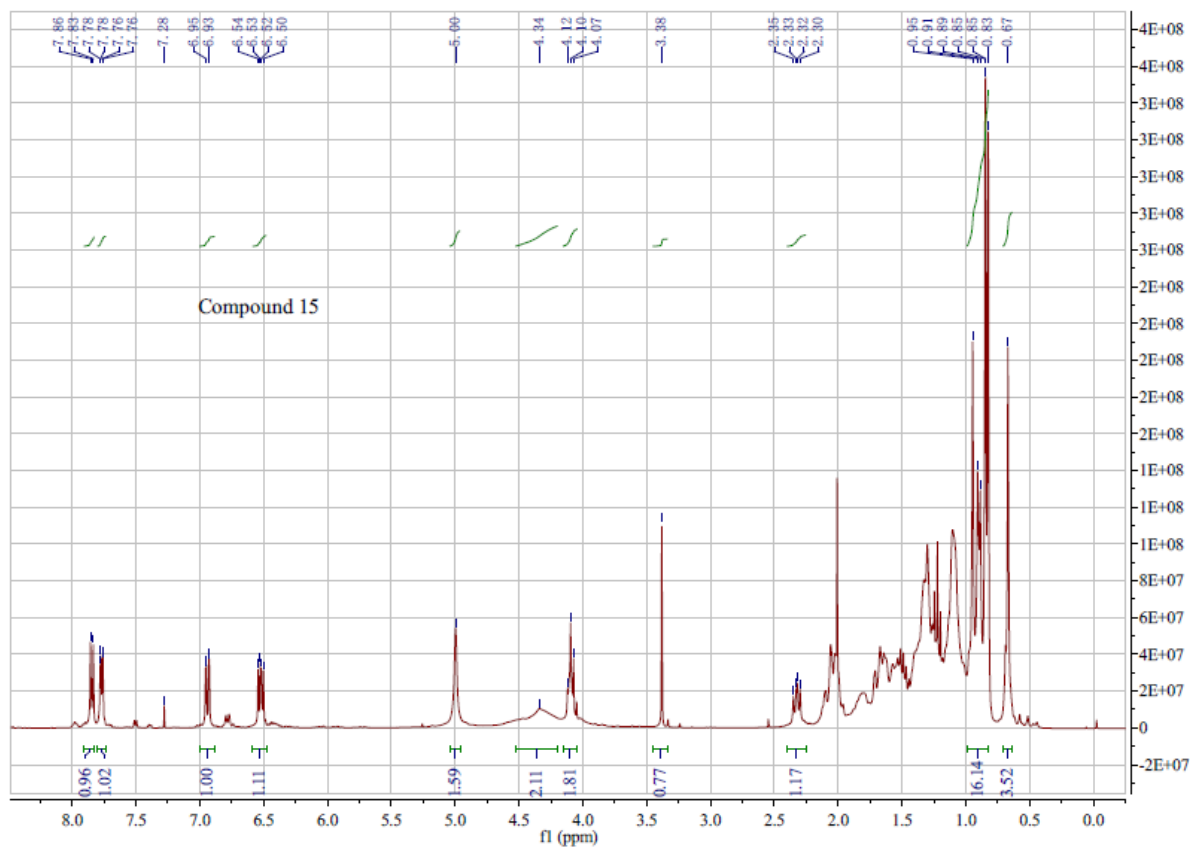Figure S39. Compound 15 <sup>1</sup>H NMR.

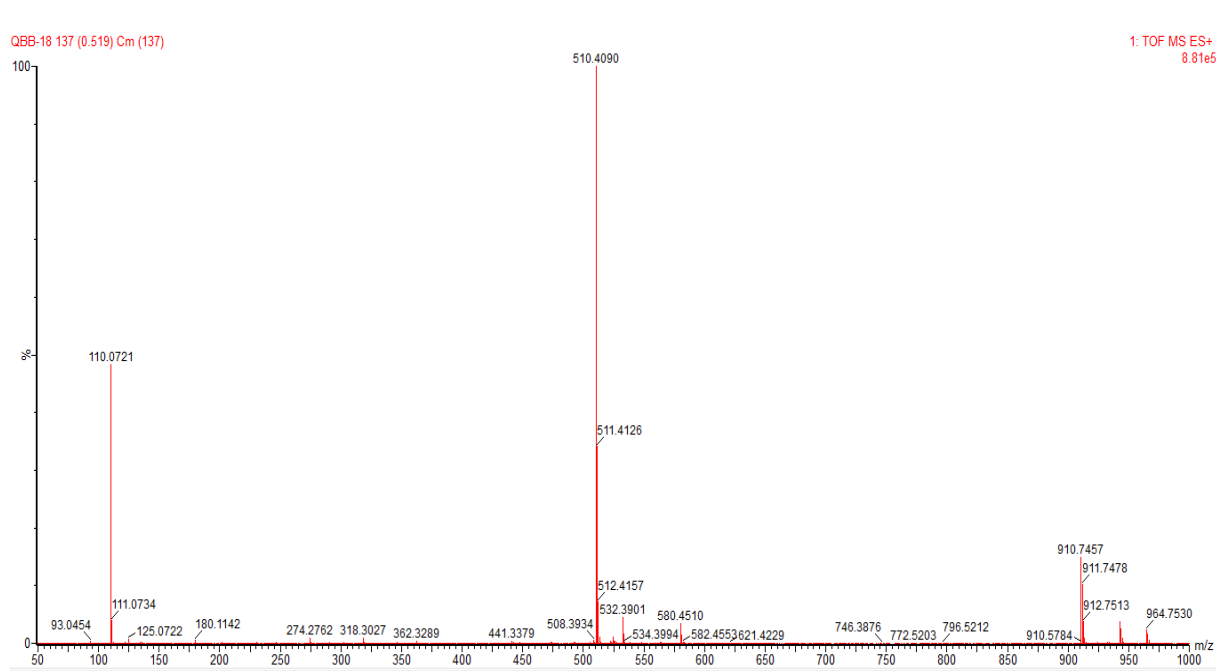

**Figure S40.** Compound **15** HREIMS.

© 2015 by the authors; licensee MDPI, Basel, Switzerland. This article is an open access article distributed under the terms and conditions of the Creative Commons Attribution license (<http://creativecommons.org/licenses/by/4.0/>).
